# Supplementary material for: What Do We Know about Social and Non-Social Factors Influencing the Pathway from Cognitive Health to Dementia? A Systematic Review of Reviews
Source: MDPI journal article supplement (doi:10.3390/brainsci12091214), 2022-09-08
Supplement: s1 [file s1]

Lenart-Bugla et al., 2022: What do we know about social and non-social factors influencing the pathway from cognitive health to dementia? A systematic review of reviews.

Supplementary material

Table S3: Exclusion criteria.

| Other disease                                                                                                                                                                                           | Reverse causality                                                                                                                                                                                                                                                                              | Non-human study                                                                                                                                                                             | Pharmacological study                                                                                                        | Caregiver research                                                                                                          | Publication type                                                                                                                                                                   | Weak link to research aims                                                                                                                                                                                                         | No influencing factors                                                                                                                                                                                                          |
|---------------------------------------------------------------------------------------------------------------------------------------------------------------------------------------------------------|------------------------------------------------------------------------------------------------------------------------------------------------------------------------------------------------------------------------------------------------------------------------------------------------|---------------------------------------------------------------------------------------------------------------------------------------------------------------------------------------------|------------------------------------------------------------------------------------------------------------------------------|-----------------------------------------------------------------------------------------------------------------------------|------------------------------------------------------------------------------------------------------------------------------------------------------------------------------------|------------------------------------------------------------------------------------------------------------------------------------------------------------------------------------------------------------------------------------|---------------------------------------------------------------------------------------------------------------------------------------------------------------------------------------------------------------------------------|
| If the study focuses on different disease(s) and there is no examination whether this disease is associated with i.e. cognitive function/ability, onset/progression of dementia, Alzheimer's and so on. | If the study focuses on the effect/impact of dementia, cognitive decline, Alzheimer's etc. on some kind of variable/factor (i.e. language skills, physical activity, weight loss, apathy). These studies examining issues where dementia/Alzheimer/cognitive decline is causing changes in XY. | If the studies included in the review are solely animal studies (i.e. rats, mice models). If there is a mixed sample with human and animal studies, we will include ("Maybe") this article. | If the study focuses on drug trials or pharmacological interventions for dementia, Alzheimer's, cognitive decline and so on. | If the review examines the situation of/interventions for family and paid carers only (not including people with dementia). | If the study is not a review based on a methodological approach, e.g. a book review, commentary, protocol, non-published dissertation, conference proceeding, conference abstract. | If dementia, Alzheimer's, cognitive decline etc. is mentioned somewhere in the abstract, but the connection to the research aims – factors associated with cognitive decline, dementia, Alzheimer's and so on – is scarcely given. | If the review is focusing on dementia, Alzheimer's, cognitive decline and so on, but is not investigating influencing factors (risk, protective) for i.e. cognitive decline/reserve, onset/progression of dementia/Alzheimer's. |
