# Supplementary material for: What Do We Know about Social and Non-Social Factors Influencing the Pathway from Cognitive Health to Dementia? A Systematic Review of Reviews
Source: MDPI journal article supplement (doi:10.3390/brainsci12091214), 2022-09-08
Supplement: s1 [file s1]

Lenart-Bugla et al., 2022: What do we know about social and non-social factors influencing the pathway from cognitive health to dementia? A systematic review of reviews.

Supplementary material  
Table S2: Search strategies.

| Database         | Command                                                                                                                                                                                                                                                                                                                                                                 | Criteria                                                                                                          | Results    |
|------------------|-------------------------------------------------------------------------------------------------------------------------------------------------------------------------------------------------------------------------------------------------------------------------------------------------------------------------------------------------------------------------|-------------------------------------------------------------------------------------------------------------------|------------|
| CINAHL Complete  | All: Abstract<br>Dementia* OR Alzheimer* OR (Cognitive Impairment) OR (Cognitive decline*) OR (Cognitive function*) OR (Cognitive reserve) OR (Cognitive capacit*) <b>AND</b> (risk factor* OR predictive factor* OR prognostic factor* OR course OR cause OR contributing factor* OR predisposing factor*) <b>AND</b> systematic review or meta-analysis               | Include: English, human, Systematic reviews, journal articles, periodicals, 2009-2019<br>Exclude: MEDline records | <b>24</b>  |
| Cochrane Reviews | All: Abstract or Title or Keyword<br>(dementia OR alzheimer* OR cognitive impairment* OR cognitive decline OR cognitive function* OR cognitive reserve OR cognitive capacit*) <b>AND</b> (risk factor* OR predictive factor* OR prognostic factor* OR course OR cause OR contributing factor* OR predisposing factor*) <b>AND</b> systematic review or meta-analysis    | Include: 2009-2019                                                                                                | <b>110</b> |
| Epistemonikos    | Manually: TI/AB:<br>("dementia" OR "alzheimer*" OR "cognitive impairment*" OR "cognitive decline" OR "cognitive function*" OR "cognitive reserve" OR "cognitive capacit*") AND ("risk factor*" OR "predictive factor*" OR "prognostic factor*" OR "course" OR "cause" OR "contributing factor*" OR "predisposing factor*") AND ("systematic review" OR "meta-analysis") | Include:<br>2009-2019, Systematic review<br><br>Exclude:<br>No PMC                                                | <b>304</b> |

Lenart-Bugla et al., 2022: What do we know about social and non-social factors influencing the pathway from cognitive health to dementia? A systematic review of reviews.

|                  |                                                                                                                                                                                                                                                                                                                                                                                                                                                                                                                                                                                                                                                                                                                                                                                                                                                                                              |                                                                          |            |
|------------------|----------------------------------------------------------------------------------------------------------------------------------------------------------------------------------------------------------------------------------------------------------------------------------------------------------------------------------------------------------------------------------------------------------------------------------------------------------------------------------------------------------------------------------------------------------------------------------------------------------------------------------------------------------------------------------------------------------------------------------------------------------------------------------------------------------------------------------------------------------------------------------------------|--------------------------------------------------------------------------|------------|
| Medline via Ovid | 1. dementia.ti,ab,kw. 2. dementia/ 3. alzheimer*.ti,ab,kw. 4. alzheimer disease/ 5. cognitive impairment.ti,ab,kw. 6. cognitive decline.ti,ab,kw. 7. cognitive function*.ti,ab,kw. 8. cognitive capacit*.ti,ab,kw. 9. cognitive reserve.ti,ab,kw. 10. Risk Factors/ 11. risk factor*.ti,ab,kw. 12. predictive factor*.ti,ab,kw. 13. course.ti,ab,kw. 14. cause.ti,ab,kw. 15. prognostic factor*.ti,ab,kw. 16. contributing factor*.ti,ab,kw. 17. predisposing factor*.ti,ab,kw. 18. 1 or 2 or 3 or 4 or 5 or 6 or 7 or 8 or 9 19. 10 or 11 or 12 or 13 or 14 or 15 or 16 or 17 20. 18 and 19 21. 20 not ("economic model*" or "regression model*" or "markov model*" or "statistical model*" or "mathematical model*" or "drug*" or "pharmac*").ti,ab,kw. 22. limit 21 to (english language and systematic review and yr=2009-2019) 23. (animals not (humans and animals)).sh. 24. 22 not 23 | limit english language and humans and "systematic review"                | <b>468</b> |
| PsycINFO         | 1. cognitive impairment*.ti,ab,kw. 2. dementia/ 3. Alzheimer's Disease/ 4. dementia.ti,ab,kw. 5. alzheimer*.ti,ab,kw. 6. cognitive function*.ti,ab,kw. 7. cognitive decline.ti,ab,kw. 8. cognitive reserve.ti,ab,kw. 9. cognitive capacit*.ti,ab,kw. 10. Risk Factors/ 11. risk factor*.ti,ab,kw. 12. predictive factor*.ti,ab,kw. 13. course.ti,ab,kw. 14. cause.ti,ab,kw. 15. prognostic factor*.ti,ab,kw. 16. contributing factor*.ti,ab,kw. 17. predisposing factor*.ti,ab,kw. 18. 1 or 2 or 3 or 4 or 5 or 6 or 7 or 8 or 9 19. 10 or 11 or 12 or 13 or 14 or 15 or 16 or 17 20. 18 and 19 21. limit 20 to ("systematic review" and "english language" and yr="2009 - 2019") 22. (animals not (humans and animals)).sh. 23. 21 not 22                                                                                                                                                   | limit english language and humans and "systematic review", yr= 2009-2019 | <b>282</b> |

Lenart-Bugla et al., 2022: What do we know about social and non-social factors influencing the pathway from cognitive health to dementia? A systematic review of reviews.

An additional search for social factors only

| Database         | Command                                                                                                                                                                                                                                                                                                                                                                                | Criteria                                                                                                                | Results |
|------------------|----------------------------------------------------------------------------------------------------------------------------------------------------------------------------------------------------------------------------------------------------------------------------------------------------------------------------------------------------------------------------------------|-------------------------------------------------------------------------------------------------------------------------|---------|
| CINAHL Complete  | All: Abstract<br>Dementia* OR Alzheimer* OR (Cognitive Impairment) OR (Cognitive decline*) OR (Cognitive function*) OR (Cognitive reserve) OR (Cognitive capacit*) AND (risk factor* OR predictive factor* OR prognostic factor* OR course OR cause OR contributing factor* OR predisposing factor*) AND (social) AND systematic review or meta-analysis                               | Include: English, human, Systematic reviews, journal articles, periodicals, 06.2019-12.2021<br>Exclude: MEDline records | 5       |
| Cochrane Reviews | All: Abstract or Title or Keyword<br>(dementia OR alzheimer* OR cognitive impairment* OR cognitive decline OR cognitive function* OR cognitive reserve OR cognitive capacit*) AND (risk factor* OR predictive factor* OR prognostic factor* OR course OR cause OR contributing factor* OR predisposing factor*) AND (social) AND systematic review or meta-analysis                    | Include: 06.2019-12.2021                                                                                                | 10      |
| Epistemonikos    | Manually: TI/AB:<br>("dementia" OR "alzheimer*" OR "cognitive impairment*" OR "cognitive decline" OR "cognitive function*" OR "cognitive reserve" OR "cognitive capacit*") AND ("risk factor*" OR "predictive factor*" OR "prognostic factor*" OR "course" OR "cause" OR "contributing factor*" OR "predisposing factor*") AND ("social") AND ("systematic review" OR "meta-analysis") | Include:<br>2019-2021, Systematic review<br><br>Exclude:<br>No PMC                                                      | 6       |

Lenart-Bugla et al., 2022: What do we know about social and non-social factors influencing the pathway from cognitive health to dementia? A systematic review of reviews.

|                  |                                                                                                                                                                                                                                                                                                                                                                                                                                                                                                                                                                                                                                                                                                                                                                       |                                                           |    |
|------------------|-----------------------------------------------------------------------------------------------------------------------------------------------------------------------------------------------------------------------------------------------------------------------------------------------------------------------------------------------------------------------------------------------------------------------------------------------------------------------------------------------------------------------------------------------------------------------------------------------------------------------------------------------------------------------------------------------------------------------------------------------------------------------|-----------------------------------------------------------|----|
| Medline via Ovid | 1. ((dementia or alzheimer* or cognitive impairment* or cognitive decline or cognitive function* or cognitive reserve or cognitive capacit*) and (risk factor* or predictive factor* or prognostic factor* or course or cause or contributing factor* or predisposing factor*) and social) and (systematic review or meta-analysis)).ab.<br>2. limit 1 to (english language and "review articles" and humans and yr="2019 - 2021")                                                                                                                                                                                                                                                                                                                                    | limit english language and humans and "systematic review" | 3  |
| PsycINFO         | ( <b>Abstract:</b> dementia OR <b>Abstract:</b> alzheimer* OR <b>Abstract:</b> cognitive impairment* OR <b>Abstract:</b> cognitive decline OR <b>Abstract:</b> cognitive function* OR <b>Abstract:</b> cognitive reserve OR <b>Abstract:</b> cognitive capacit*) AND ( <b>Abstract:</b> risk factor* OR <b>Abstract:</b> predictive factor* OR <b>Abstract:</b> prognostic factor* OR <b>Abstract:</b> course OR <b>Abstract:</b> cause OR <b>Abstract:</b> contributing factor* OR <b>Abstract:</b> predisposing factor*) AND <b>Abstract:</b> social AND ( <b>Abstract:</b> systematic review OR <b>Abstract:</b> meta-analysis) AND <b>Document Type:</b> Journal Article AND <b>Methodology:</b> Systematic Review OR Meta Analysis AND <b>Year:</b> 2019 To 2021 |                                                           | 12 |

Lenart-Bugla et al., 2022: What do we know about social and non-social factors influencing the pathway from cognitive health to dementia? A systematic review of reviews.

|        |                                                                                                                                                                                                                                                                                                                                                                                                                                                                                                                                                                                                                         |                                                                |           |
|--------|-------------------------------------------------------------------------------------------------------------------------------------------------------------------------------------------------------------------------------------------------------------------------------------------------------------------------------------------------------------------------------------------------------------------------------------------------------------------------------------------------------------------------------------------------------------------------------------------------------------------------|----------------------------------------------------------------|-----------|
| PubMed | (((dementia[Title/Abstract] OR alzheimer*[Title/Abstract] OR cognitive impairment*[Title/Abstract] OR cognitive decline[Title/Abstract] OR cognitive function*[Title/Abstract] OR cognitive reserve[Title/Abstract] OR cognitive capacit*[Title/Abstract]) AND ((risk factor*[Title/Abstract] OR predictive factor*[Title/Abstract] OR prognostic factor*[Title/Abstract] OR course[Title/Abstract] OR cause[Title/Abstract] OR contributing factor*[Title/Abstract] OR predisposing factor*[Title/Abstract])) AND (social[Title/Abstract])) AND ((systematic review[Title/Abstract] OR meta-analysis)[Title/Abstract]) | Limit to: meta-analysis, systematic review;<br>06.2019-12.2021 | <b>30</b> |
|--------|-------------------------------------------------------------------------------------------------------------------------------------------------------------------------------------------------------------------------------------------------------------------------------------------------------------------------------------------------------------------------------------------------------------------------------------------------------------------------------------------------------------------------------------------------------------------------------------------------------------------------|----------------------------------------------------------------|-----------|
