# Supplementary material for: What Do We Know about Social and Non-Social Factors Influencing the Pathway from Cognitive Health to Dementia? A Systematic Review of Reviews
Source: Brain Sci. 2022 Sep 8;12(9):1214. doi: 10.3390/brainsci12091214 (PMC9497077; doi:10.3390/brainsci12091214)
Supplement: Supplementary file 1 [file brainsci-12-01214-s001.zip]

Archive with 7 entries (7 files):
- List S1. Full references.pdf
- Table S1. PRISMA checklist.pdf
- Table S2. Search strategies.pdf
- Table S3. Exclusion criteria.pdf
- Table S4. Full characteristics of included studies.xlsx
- Table S5. AMSTAR scoring of included studies.xlsx
- Table S6. List of factors in subcategories.xlsx
