# Supplementary material for: What Do We Know about Social and Non-Social Factors Influencing the Pathway from Cognitive Health to Dementia? A Systematic Review of Reviews
Source: Brain Sci. 2022 Sep 8;12(9):1214. doi: 10.3390/brainsci12091214 (PMC9497077; doi:10.3390/brainsci12091214)
Supplement: Supplementary file 1 [file brainsci-12-01214-s001.zip › Table S4. Full characteristics of included studies.xlsx]

## Sheet: Arkusz1
Lenart-Bugla et al., 2022: What do we know about social and non-social factors influencing the pathway from cognitive health to dementia? A systematic review of reviews.
Supplementary material Table S4: Full characteristics of included studies.
First author (+ et al.)	Publication year	Country (1st author affiliation)	Years covered (from - till) nd=no data	No. Of studies included nd=no data	Type of review SR=Systematic review MA=Meta-analysis	Cognitive Health status: D=Dementia (not specified) AD=Alzheimer disease VD=Vascular Dementia LBD=Lewy Body dementia FTD=Fronto-temporal dementia MCI=Mild cognitive impairment SCI=Subjective cognitive impairment CI=Cognitive impairment CD=Cognitve decline CR=Cognitive reserve CH=Cognitive healthy	Age group of participants: 18 and above (all ages), Young adulthood and mid-life (65>), Mid-life and late-life (≥ 40 ), Late-life (≥65) nd= no data	Results/ factors with direction of influence
Aarsland, et al.	2010	UK	1990-2008	24 (1378)	SR + MA	VD	midlife, latelife	Physical activity (protective for VaD)
Agarwal, et al.	2014	India	any prior 06.2013	7	MA	AD	midlife, latelife	These results indicate that all genotypes of ApoE e4 allele, that is, e2/4, e3/4, and e4/4, are associated with an increased risk of AD, whereas ApoE e2/2, e2/3, and e3/3 are protective for AD.
Ali, et al.	2018	Canada	2001-2018	36	SR	SCI CI	midlife, latelife	Genetic predispositions: APOE ?4 and SCD (risk of conversion to objective cognitive impairment)
Allan, et al.	2010	UK	nd	17	MA	D, CD	Late-life	There was no significant difference in cognitive decline based on the presence of ApoE4 in dementia patients.
Almeida, et al.	2018	Brazil	2009-2017	38	MA	AD	nd	We validated the risk for LOAD with BIN1 (rs744373), CR1 (rs6656401), and ABCA7 (rs376465), as well as the protective association for MS4A6A (rs610932) and CLU(rs11136000) variants - genetic predispositions (protective and risk)
Anderson et al.	2014	Australia	2009-2014	21	SR	CD	Late life	All studies found that physical activity was associated with lower rates of cognitive and physical decline and a significant reduction in all-cause mortality.
Angelousi, et al.	2014	France	any prior 2013	28	SR + MA	CD	midlife, latelife	Orthostatic hypotension (risk of cognitive decline)
Annweiler, et al.	2016	France	2004-2011	2273 cases	MA	CI	midlife, latelife	Vitamin D insufficiency (risk of cognitive impairment)
Anstey, et al.	2009	Australia	1800-2007	25	SR + MA	D, AD, VD, MCI, CD, CI, CH	Late life	Light to moderate alcohol intake (protective for AD, VaD, and any dementia)
Anstey, et al.	2010	Australia	1800-2009	16	MA	AD, VD, D, FTD, LBD	midlife, latelife	Normal BMI in midlife (protective for dementia), and higher BMI and obesity in midlife (risk of dementia)
Arab, et al.	2013	USA	any prior 2012	6	SR	CD	midlife, latelife	Caffeine (protective for cognitive decline)
Aridi, et al.	2017	Australia	any prior January 2017	31	SR	AD, D, MCI, CI, CD, CH	midlife, latelife	The Mediterranean diet (protective for cognitive decline and developing AD)
Assuncao, et al.	2018	Brazil	any prior 7 July 2017	25	SR	AD, D, CH	Late life	Metabolic Syndrome (influence on cognitive decline in elderly population was vastly inconsistent – unclear)
Atti, et al.	2019	Italy	1.01.2000 - 31.08.2018	9	SR + MA	VD, MCI, D	midlife, latelife	Metabolic Syndrome (risk of pure VaD, and risk of progression from MCI to dementia)
Attuquayefio, et al.	2015	Australia	nd	30	SR	CH	18 and above	Diet - changes in energy and fat intake (no consistently clear dietary effect on memory and attention – unclear)
Autier, et al.	2014	France	nd	194	SR	CH	nd	Supplementation in elderly people (mainly women) with 20 mug vitamin D per day seemed to slightly reduce all-cause mortality. The discrepancy between observational and intervention studies suggests that low 25(OH)D is a marker of ill health. Inflammatory processes involved in disease occurrence and clinical course would reduce 25(OH)D, which would explain why low vitamin D status is reported in a…
Azarpazhooh, et al.	2018	Canada	1900-Feb 2017	10	SR + MA	AD, VD, LBD, D, CH	Late life	Patients with mixed pathologies (vascular lesions) have nearly twice the incremental risk of dementia compared with patients with only Alzheimer-type lesions.
Bastida, et al.	2019	Spain	2000-2015	20	SR + MA	D, FTD, AD	midlife, latelife	Personality disorder, specifically borderline and narcis- sistic personality disorder (risk of future dementia)
Beauchet et al.	2014	France	nd	8	SR + MA	D,MCI, CD	Late life	Higher stride time variability (risk of cognitive decline, MCI and dementia)
Beauchet, et al.	2018	Canada	no limits	7	SR + MA	CH, VD, AD, (MCR)	Late life	Motoric cognitive risk (MCR) syndrome and Cardiovascular diseases with their risk factors (CVDRF- obesity, hypertension, diabetes) (risk of AD and VaD)
Becker, et al.	2018	UK	any prior 12 Jan 2018	9	SR + MA	AD, VD, CH	midlife, latelife	Anxiety (risk of both type of dementia and AD), depressive symptoms (risk of AD)
Besser, et al.	2017	USA	1.02.1989-5.03.2016	25	SR	D, AD, CI, CD	midlife, latelife	Cognition: Lower NSES (negative), Living in a neighborhood with a greater percentage of adults aged 65 years and above and fewer Hispanics or African Americans (positive), Greater psychosocial disorder (negative), Positive acts of neighboring (positive), perceptions of friendly neighbors or the number of children, relatives, and friends in the neighborhood (no association). Neighborhood area dedi…
Beydoun et al.	2014	USA	1990-2012	247	SR + MA	AD, D VD, MCI, CI, CD	18 and above	Higher hyperhomocysteinemia (Hcy) levels, lower educational attainment, and decreased physical activity (risk of incident AD), alcohol consumption, n-3 fatty acids, vitamin E, midlife smoking and caffeine (unclear)
Blom et al.	2013	Netherlands	nd	20	SR	D	midlife, latelife	LDL-cholesterol (risk of dementia), Inconsistent results were found for other VRF (Hypertension, Diabetes mellitus, Overweight, Smoking)
Bolandzadeh, et al.	2012	Canada	2000-2011	14	SR	CH	midlife, latelife	Evidence suggests that periventricular WML ( white matter lessions) may have a significant negative impact on cognitive abilities of older adults. However, whether WMLs in different brain regions have a differential effect on cognitive function remains unclear.
Borges, et al.	2019	Italy	1.03.2001 - 01.01.2018	6	SR + MA	D, VD	Late life	Frail status was most associated with the risk of dementia, particularly non-AD and vascular dementia, even after adjusting for many confounders.
Boss et al.	2015	USA	2000-2013	10	SR	CI, CD, AD,D	midlife, latelife	Greater loneliness is associated with lower cognitive function/ Dementia/ AD.
Brundel, et al.	2012	Netherlands	1997-2010	32	SR	VD, AD	Late life	The overall picture is that microinfarcts are common, particularly in patients with vascular dementia (weighted average 62%), Alzheimer’s diseas e (43%) , and demented patients with both Alzheimer-type and cerebrovascular pathology (33%) compared with nondemented older individuals (24%).
Bubu, et al.	2017	US	1946-2017	27	SR + MA	CI, AD	midlife, latelife	individuals with sleep problems including short and long sleep duration, poor sleep quality, circadian rhythm abnormality, insomnia, and OSA had a 1.68 times higher risk for the combined outcome of cognitive decline and AD compared to individuals without sleep problems
Canevelli, M. et al	2013	Italy	1995-2009	21	SR	FAD ( familial AD)	18 and above	Overall, the mutations involving the PSEN2 gene represent an extremely rare cause of FAD, having been reported to date in less than 200 cases. They are mainly associated, despite some peculiar and heterogeneous features, to a typical AD phenotype.
Canevelli, M. et al	2016	Italy	2012-2015	11	SR	CD, D	midlife, latelife	several dietary patterns and nutritional components may constitute promising strategies in postponing, slowing, and preventing cognitive decline. However, supporting evidence is overall weak and further studies are needed.
Cao, L. et al	2016	China	1997-2014	43	MA	D	18 and above	higher adherence to the Mediterranean Diet is associated with a reduced risk of developing dementia (higher consumption of unsaturated fatty acids, antioxidants, and B vitamins decrease the risk of dementia while smoking and higher consumption of aluminum increase the risk of dementia. Low levels of vitamin D were associated with cognitive decline. The effect of fish, alcohol, vegetables, and fru…
Catindig et al.	2012	Singapore	2000-2012	58	SR	D, CI	18 and above	Risk factors: Stroke, Atherosclerosis, Hypertension, metabolic syndrome, APOE 2 + 4, ethnic differences, Homocysteine, Nutrition
Chan, et al.	2019	Hong Kong	any prior Nov 15, 2018	18	SR + MA	CH, D, MCI	midlife, latelife	Depression is associated with an increased risk of dementia, and treatment with antidepressants has not been shown to be able to reduce the risk of dementia and MCI among patients with depression. In addition, use of antidepressants may be associated with an increased risk of dementia and MCI in patients with depression.
Chang et al.	2013	China	1966-2012	10	SR	D,CI,CD	midlife, latelife	Asymptomatic carotid stenosis seems to be associated with cognitive dysfunction. Linked factors like older age and cerebral hypoperfusion seem to have a connection to cognitive decline too.
Chapko, et al.	2017	Scotland	1946-6.09.2013	34	SR	AD, VD, LBD, FTD, MCI, CH, CR	midlife, latelife	education has a protective effect on general cognition, while occupation as a potential CR determinant presented inconclusive results. Leisure activities, cognitive activities are protective for cognitive decline. Bilingualism is a cognitive reserve determinant. Low neuroticism and high conscientiousness, but not extraversion, openness or agreeableness provided individuals with resilience to AD n…
Charidimou, A. et al.	2018	USA	1995-2016	7	MA	D	midlife, latelife	CMBs presence was independently associated with incident dementia risk, but the association was marginal statistically and with considerable degree of heterogeneity.
Chen, H. et al.	2018	china	2011-2017	10	MA	AD	midlife, latelife	Plasma or serum 25-hydroxyvitamin D concentration was inversely related to the risk of dementia and Alzheimer’s disease, consistent with a linear dose–response relationship.
Chen, J. et al.	2018	China	any prior 20 June 2018	8	SR + MA	D, CH	midlife, latelife	Tooth loss may be a risk factor for the development of dementia. In addition, there is a dose-response relationship with the increase of missing teeth.
Chen, Q. et al.	2016	china	<10.2015	12	MA	AD	nd	In summary, our meta-analysis results showed that ABCA1 rs2422493 polymorphism was a risk factor for AD while PTGS2 rs20417 variant showed a protective effect on AD risk. In addition, ABCA1 rs2066718 and rs1800977 polymorphisms might not con- tribute to AD susceptibility in general population, but they should play a role on AD development when interacted with ApoE-e4.
Chen, R. et al.	2013	UK	1966-2012	3	SR	CI	Late life	This study provides evidence that passive smoking is associated with global cognitive deficits in older adults and could be a risk factor for cognitive impairment.
Cheng, C. et al.	2017	Taiwan	1991-2016	9	SR	D	midlife, latelife	Considering the relatively high proportion of ARD in early-onset dementia and its potentially reversible course, future investigation into ARD is necessary.
Cheng, D. et al.	2014	China	1999-2008	17	MA	AD	nd	Based on this meta-analysis, we conclude that the ESR1 PvuII polymorphism might be a risk factor in AD development in Caucasian populations, not in Asian populations.
Cheng, G. et al.	2012	China	1966-2010	19	MA	AD, D, CI, CD	midlife, latelife	The present study confirmed diabetes as a risk factor for MCI, AD, VD and any dementia using a quantitative meta-analysis of longitudinal studies. Compared with subjects without diabetes, those with diabetes were at more than double the risk of developing VD, and the relative risk of developing AD, MCI and any dementia were 1.46, 1.21 and 1.51 respectively.
Cheng, H.G. et al	2016	China	1990 - 2015	20	SR	D	midlife, latelife	In China, low levels of education and low income were associated with a higher prevalence of dementia. One such finding was the interaction between education and income for dementia in China. The highest reported prevalence of dementia was among idividuals with high incomes who also had low levels of education.
Cherbuin et al.	2015	Australia	1996-2014	36	SR + MA	D, AD, VD	Late life	In conclusion, when considering specific screening instruments at specified threshold, late-life depression and depressive symptomatology are consistently associated with an increased risk of dementia and AD.
Childress, et al.	2013	USA	1966-2011	22	SR	D	18 and above	PTSD effects on hippocampal neuronal integrity represent either a plausible risk factor or potential modifier for subsequent dementia.
Cipolli, et al.	2019	Brazil	1.03.2001-18.12.2018	10	SR + MA	CH	late life	Sarcopenia was significantly associated with cognitive impairment. Sarcopenia may represent a risk factor for cognitive decline, but longitudinal studies are needed to explore causality.
Clifford, A. et al	2016	UK	2006-2015	31	SR	CH	18 and above	Our systematic review has found evidence suggestive of a relationship between air pollution exposure and cognitive parameters through out the life span. Recent studies have also shown associationsof air pollution with increased incidence of clinically diagnosed dementia (e.g. Oudin et al.,2015). Our findings of an association of air pollution and cognition thus align with the previous findings.
Cooper et al.	2015	UK	1900-2014	92	SR + MA	CI, CD,D, MCI	midlife, latelife	Diabetes increased the risk of conversion to dementia. Other prognostic factors that are potentially manageable are prediabetes and the metabolic syndrome, neuropsychiatric symptoms, and low dietary folate. Dietary interventions and interventions to reduce neuropsychiatric symptoms, including depression, that increase risk of conversion to dementia may decrease new incidence of dementia.
Crean, et al.	2011	USA	nd	101	SR + MA	AD	nd	AD patients recruited in Asian and southern European/Mediterranean communities seemed to have significantly lower E4 carrier status estimates (37 and 43%) than those recruited in North America (58%) or northern Europe (64%; all: p ! 0.05).
Crichton et al.	2012	Australia	nd	19	SR	MCI, AD, D, CI, CD	nd	Having MetS in midlife is associated with AD [25, 26] cross-sectionally, with increased risk for VaD over 3.5 to 4 years [18, 24], and with increased risk of progression from MCI to dementia over the same time period [19]. In populations over the age of 75, having MetS was associated with a lower risk of AD [35], and with decelerated cognitive decline [29].
Crichton et al.	2013	Australia	any prior 2012	21	SR	D,AD,CD,MCI,CI	midlife, latelife	Findings do not consistently show habitual intakes of dietary antioxidants (Vitamin C, E, beta carotene, flavonoids) are associated with better cognitive performance or a reduced risk for dementia.
Crocker, E. et al.	2016	Ireland	any prior 06.2014	3	SR	CD	18 and above	After performing this systematic review we determined that PoD after cardiac operation is associated with a decrease in cognitive function
da Silva et al.	2013	Portugal	any prior 2011	51	SR	D,AD,VD,LBD,FTD	nd	Affective disorders appear to be associated with an increased risk of developing dementia, and one that is dependent on clinical and demographic variables. Depression may be both a prodrome and a risk factor for dementia.
Dahl et al.	2013	Sweden	1946-2012	11	SR	CH	18 and above	It shows clear evidence that midlife obesity is associated with cognitive aging, whereas this association was weaker in late life. The direction of the association and the causality remain to be clarified.
Dangour et al.	2010	UK	till 2007	33	SR	CD, VD, AD, D	18 and above	In conclusion, the available evidence base is currently insufficient to draw firm conclusions about the effects of individual dietary factors on the development or treatment of AD and dementia
Danna, S.M. et al	2016	Canada	any prior 2015	15	SR	CH, D	18 and above	Nonetheless, this review found the presence of comorbid depression was associated with poorer cognitive outcomes than for persons with diabetes alone. While large-scale preventive efforts must address epidemic levels of diabetes and its comorbidities, on the patient level healthcare professionals must be cognizant of the added difficulties that depression poses to patients and the extra support r…
Davies, G. et al.	2015	uk	nd	31 cohorts	MA	CH	midlife, latelife	We report 13 genome-wide significant single-nucleotide polymorphism (SNP) associations in three genomic regions, 6q16.1, 14q12 and 19q13.32 (best SNP and closest gene, respectively: rs10457441, P= 3.93 × 10− 9, MIR2113; rs17522122, P= 2.55 × 10− 8, AKAP6; rs10119, P= 5.67 × 10− 9, APOE/TOMM40). We report one gene-based significant association with the HMGN1 gene located on chromosome 21 (P=1×10− …
De Almondes M. et al	2016	Brazil	any prior 2015	5	SR + MA	D, CI	18 and above	Insomnia is associated with an increased risk for dementia
de Assis, et al.	2017	Brazil	nd	5	SR	MCI, CI, CH	midlife, latelife	Positive outcomes from BDNF and EF variables were displayed by all the populations exposed to exercise across studies. Aerobic exercise was shown to be a major source for the enhancement of the BDNF-dependent executive functioning, when compared to cognitive stimulation. Moreover, the effect of exercise-dependent BDNF on domains of executive functioning appears to occur in a dose-dependent manner…
De Keijzer, C. et al	2016	Spain	any prior 2016	13	SR	CH, D	18 and above	However, it is suggestive for beneficial associations between green spaces and cognitive development in childhood and cognitive function in adulthood. Results for an association with cognitive decline in older adults have been inconsistent.
Deckers et al.	2014	Netherlands	2009-2012	291	SR	D,CI,CD	midlife, latelife	After triangulation of both methods and re-weighting by experts, strongest support was found for depression, (midlife) hypertension, physical inactivity, diabetes, (midlife) obesity, hyperlipidemia, and smoking, while more research is needed for coronary heart disease, renal dysfunction, diet, and cognitive activity
Deckers, K. et al.	2017	Netherlands	any prior 2016	22	SR + MA	D	midlife, latelife	The overall evidence for an association between renal dysfunction and cognitive impairment or dementia is modest. Evidence suggests that albuminuria is associated with higher odds of developing cognitive impairment or dementia.
Deligkaris et al.	2014	Greece	2005-2013	15	SR	CI	nd	The results suggest that burnout is connected to specific cognitive deficits. In particular, burnout has been found to be associated with a decline in three main cognitive functions: executive functions, attention and memory.
Desai, R. et al.	2020	UK	any prior 08.2019	12	SR + MA	D	midlife, latelife	The pooled effect size indicated an elevated risk of incident dementia when living alone (all studies RR = 1.30; 95 % CI: 1.15–1.46; low risk of bias studies (RR = 1.31; 95 % CI: 1.13–1.51). The PAF for living alone was 8.9 %. Social isolation is a more important risk factor for dementia than previously identified, with living alone associated with greater population risk than physical inactivity…
Di Marco et al.	2014	UK	any prior 2013	75	SR	D,AD	nd	Broad consensus emerged on the protective role against dementia of leisure activities, physical aktivities, especially social ones. Conflicting results were found for the association between dementia and putative risk factors (smoking) and protective factors (mild-to-moderate alcohol consumption, dietary antioxidants, Mediterranean diet, and living with others).
Dimakakou, et al.	2018	Scotland	any prior March 2018	37	SR	D, AD	18 and above	Available evidence indicates a consistent positive association between ambient air pollution and both T2DM and neurodegeneration risk, such as dementia and a general decline in cognition. However, corresponding evidence for workplace exposures are lacking.
Diniz et al.	2013	USA	nd	23	SR + MA	D,AD,VD	Late life	The study provides robust evidence that depression is independently associated with an independent increased risk of Alzheimer’s disease and vascular dementia in older adults. The risk of vascular dementia may be significantly higher than for Alzheimer’s disease in these individuals.
Diniz, B. S. et al.	2017	US	1980-2016	6	SR + MA	D	nd	our meta-analysis provides robust evidence that bipolar disorder increases the risk of dementia in older adults
Dobbels, et al.	2019	Belgium	any prior July 20, 2018	10	SR	CH	nd	Nearly all studies demonstrated a significant impairment of spatial cognition in patients with bilateral vestibulopathy. In the few papers investigating nonspatial cognition, worse outcome was demonstrated in patients with bilateral vestibular loss performing cognitive tasks assess- ing attentional performance, memory, and executive function.
Dong, et al.	2018	China	1950-Feb 2017	17	SR + MA	AD, CH	Late life	In conclusion, this meta‐analysis based on case‐control studies suggested that serum vitamin E concentration was lower in patients with AD than in the controls among older people. Low‐serum vitamin E levels may be a risk factor for AD. However, because of substantial heterogeneity among the included studies, the results should be treated with caution.
Dong, X. Et al	2017	china	2000-2015	54	Meta-analysis (MA)	AD	nd	Mutants in rs1800587 ofIL-1A, rs1143634 of IL-1B, rs12989701, and rs744373 of BIN1 were
Du, K. et al.	2017	china	any prior 2017	17	SR + MA	MCI AD CI	midlife, latelife	Our findings show that the serum Mn levels are lower in AD patients, and Mn deficiency may be a risk factor for AD.
Du, N. et al.	2016	china	any prior 24.10.2016	24	SR + MA	AD	nd	High serum uric acid levels were significantly associated with decreased risk of Alzheimer’s disease
Dyer, et al.	2019	Ireland	any prior to February 2018	2	Systematic Review (SR)	CH	midlife, latelife	Lifestyle intervention (daily calorie intake, physical activity, diabetes support and education) had no influence for the prevalence of MCI or dementia in neither T2DM nor non-T2DM. In the LIFE study of 415 patients with diabetes, cognitive performance was better in those assigned to physical activity in comparison to control.
Elias-Sonnenschein, et al.	2011	Netherlands	nd	35	Meta-analysis (MA)	AD, MCI	midlife, latelife	The APOE-34 allele is associated with a moderately increased risk for progression from MCI to AD-type dementia.
Ennis et al.	2015	Canada	1966-2013	11	Systematic Review (SR)	CI	midlife, latelife	The review could not make conclusions as to whether memory impairment occurred prior to or during homelessness.
Etgen et al.	2012	Germany	1980-2012	10	SR + MA	CI, D	18 and above	This meta-analysis revealed that participants with CKD (Chronic Kidney Disease) had a significantly increased risk of cognitive impairment compared with those without CKD either in cross sectional or in longitudinal studies.
Etgen et al.	2012	Germany	nd	7	SR + MA	CI,D	Late life	Data from crosssectional and longitudinal studies suggest an association between cognitive impairment and vitamin D deficiency. Meta-analysis showed an increased risk of cognitive impairment in those with low vitamin D compared with normal vitamin D
Fang, et al.	2018	China	any prior March 2018	21	SR + MA	D, CH	midlife, latelife	Findings from this well-designed meta-analysis of 21 observational studies add to the accumulating evidence that tooth loss is a risk factor for dementia. Results from the crude model showed an overall 162% increase in de- mentia risk in adults, comparing individuals with high number of tooth loss to those with low number of tooth loss. We also observed an overall 55% increase in de- mentia occur…
Fei, Jianhua	2013	China	1995-2009	8	Meta-analysis (MA)	AD	midlife, latelife	APOE ε4-allele conferred increased risk for progression to dementia in MCI subjects.
Fink, H. et al.	2015	USA	1990-2015	25	Systematic Review (SR)	CI	midlife, latelife	Intermediate- and long-term cognitive impairment in older adults attributable to the studied cardiovascular proce- dures may be uncommon. Nevertheless, clinicians counseling patients before these procedures should discuss the uncertainty in their risk for adverse cognitive outcomes.
Forbes et al.	2015	Canada	2011-2013	17	Systematic Review (SR)	D	Late life	The review suggests that exercise programs may improve people with dementia’s ability to perform ADLs. This review found no clear evidence of benefit from exercise on cognitive functioning, neuropsychiatric symptoms, and depression.
Ford, A.H. et al.	2018	Australia	any prior 31 August 2017	14	SR + MA	AD, D, CI, MCI	midlife, latelife	In summary, we found a positive association between hearing impairment and incident dementia in both our longitudinal cohort of older men and in the meta-analysis of available prospective studies.
Ford, E. et al.	2018	UK	any prior 7 Jan 2016	20	SR + MA	D, AD, VD, CH	midlife, latelife	Meta-analysis showed that neuropsychiatric symptoms including depression, anxiety, and seizures, cognitive symptoms, and history of stroke, were positively associated with dementia. Cardiovascular risk factors such as hypertension, heart disease, dyslipidaemia and diabetes were positively associated with VaD and nega- tively with AD.
Forero, D. et al.	2016	Colombia	any prior 9.2015	13	Meta-analysis (MA)	AD	Late life	Our results show a consistent evidence of shorter telomeres in AD patients and highlight the importance of the analysis of epigenomic markers associated with neurodegeneration and with the risk for common and severe neurological diseases, such as AD
Forlenza et al.	2013	Brazil	1999-2012	248	Systematic Review (SR)	MCI	nd	On clinical grounds, the cross-sectional diagnosis of MCI has limited prognostic relevance. Neuropsychiatric symptoms have been consistently associated with faster cognitive decline and with increased risk of progressing to dementia across individuals with MCI
Fotuhi et al.	2009	USA	1980-2008	15	Systematic Review (SR)	CD, AD, D, MCI, CH	Late life	Our systematic review of observational studies in the literature suggests that long-chain omega-3 fatty acids provide a modest benefit with regard to slowing cognitive decline among elderly individuals without dementia.
Galbiati, et al.	2019	Italy	any prior October 2017	51	SR + MA	D	late life	The majority of RBD patients converted to Parkinson's Disease (43%), followed by Dementia with Lewy Bodies (25%). The estimated risk for RBD patients to develop a neurodegenerative disease over a long-term follow-up is more than 90%.
Gao et al.	2013	China	1966-2011	12	Meta-analysis (MA)	D,AD,VD,MCI	midlife, latelife	The results from this meta-analysis showed that the risk of dementia or MCI was higher among people with depression than those without. Depression patients are more than double at the risk of developing VD and also have high risk of developing AD, any dementia, and MCI.
Gao, L. et al.	2016	china	any prior 08.2015	51	Meta-analysis (MA)	AD	nd	Rs2177369 and rs3810950 of CHAT are associated with AD susceptibility, but rs1880676 and rs868750 are not. Rs1937 and rs2306604 of TFAM, and rs10997691 and rs7070570 of VR22 are not significantly associated with AD risk
Gimson, et al.	2018	UK	any prior 8 March 2017	4	Systematic Review (SR)	D, AD, MCI, CH	Late life	This systematic review found four high-quality studies that all showed a positive association between clinically significant anxiety and risk of late-onset dementia over a mean interval of at least 10 years from anxiety assess- ment to dementia diagnosis, even after accounting for potential confounders.
Goodwill, A. et al.	2017	Australia	2009-2016	29	SR + MA	D CD	18 and above	Low vitamin D was associated with worse cognitive performance (OR = 1.24, CI = 1.14–1.35) and cognitive decline (OR = 1.26, CI = 1.09–1.23); with cross-sectional yielding a stronger effect compared to longitudinal studies. Vitamin D supplementation showed no significant benefit on cognition compared with control
Gore et al.	2014	UK	1984-2014	94	Systematic Review (SR)	LBD	nd	The role of Cerebrospinal fluid (CSF) and serum biomarkers for both diagnoses is an interesting area although some results are conflicting and further work in this area is needed. Delirium and Dementia with Lewy bodies share a number of features and delirium may, in some cases, represent early or ‘prodromal’ DLB.
Guan, F. et al.	2012	China	1996-2004	29	Meta-analysis (MA)	AD	nd	study suggests that the common a1-antichymotrypsin signal peptide -15A/T polymorphism may not be a major risk factor for AD. However, the polymorphism is capable of increasing LOAD risk.
Guan, J.W. et al.	2011	China	1966-2011	12	Meta-analysis (MA)	AD	midlife, latelife	Thus we conclude here that there was no association of risk for AD with hypertension. Since the association between hypertension and risk for AD has been an area of controversy, in the present study, we have cleared this using a meta-analysis, as this was a robust finding
Guerchet et al.	2011	France	1823-2011	12	Systematic Review (SR)	AD, CI, D	midlife, latelife	All except one reported a significant association between a low anklebrachial index and cognitive impairment, dementia or AD. Beyond cognitive impairment, patients with PAD are at an increased risk to develop dementia or Alzheimer’s disease.
Gulpers, G. et al	2016	Netherlands	any prior 2015	20	SR + MA	CI,D	18 and above	Anxiety is associated with an increased risk for cognitive impairment and dementia in the community. Stronger associations were driven by higher age suggesting it is a prodromal symptom
Gunnarsson, et al.	2019	Sweden	any prior 2018	50	SR + MA	AD	nd	Based on 19 studies the weighted RR for occupational exposure to EMFs was 1.33 for AD.
Guure, C.B. et al	2017	Ghana	nd	45	Meta-analysis (MA)	CD, D	midlife, latelife	Our findings suggest that physical activity is more protective against Alzheimer's disease than it is for all-cause dementia, vascular dementia, and cognitive decline.
Haaksma, M. et al.	2017	netherlands	any prior 2016	11	Systematic Review (SR)	D CD	Late life	main finding was that increased somatic comorbid disease burden was associated with increased cognitive, functional and neuropsychiatric symptoms in LOAD. Nine studies showed an association between comorbid disease burden and LOAD symptoms, while only two studies found no association.
Hägg, S. et al.	2017	Sweden	nd	12 cohorts	Meta-analysis (MA)	CI	18 and above	we suggest causal effects from longer TL on better cognitive performance, where APOE ε4-carriers might be at differential risk.
Hajduk et al.	2013	USA	1980-2012	15	Systematic Review (SR)	D,CD	midlife, latelife	Patients with Heart Failure (HF) remain at risk of greater cognitive decline over the long-term compared to patients without. Clinical interventions that improve cardiac function may also improve cognitive function, which has implications for the health and quality of life of patients and their families.
Hamer et al.	2009	UK	1990-2007	16	Systematic Review (SR)	CH, AD, D, CI, CD	18 and above	The present meta-analysis of prospective cohort studies suggests that physical activity reduces the risk of dementia and Alzheimer’s disease by 28% and 45% respectively. However, the optimal dose of physical activity for risk reduction remains to be accurately defined.
Hao et al.	2011	China	1966-2009	9 (198476)	Systematic Review (SR)	CD, VD, AD, D	midlife, latelife	In this systematic review of population-based studies, it brings together the evidence on the risk of cognition function in patients with MS, which indicates that the MS may be associated with cognitive impairment and vascular dementia but not for AD, although there is discrepancy. MS may have a synergistic effect on the cognitive disorders, which needs to be further investigated.
Hasselbalch, et al.	2010	Denmark	2004-2009	11	SR	CI	18 and above	Unipolar disorder (risk of cognitive impairment)
He, D. et al.	2013	China	2005-2010	7	Meta-analysis (MA)	AD	nd	the result of this meta-analysis suggested that VEGF promoter polymorphisms ( − 2578C/A, − 1154G/A) might not contribute to the susceptibility of AD
Henneghan, A.	2016	usa	2005-2015	27	SR + MA	CI	18 and above	Many women unfortunately experience CRCI af- ter breast cancer chemotherapy, with limited treatment options available to improve cognitive function
Heringa, et al.	2013	Netherlands	1990-2012	16	Systematic Review (SR)	D	midlife, latelife	there is a correlation between retinal microvascular changes and dementia, cognitive impairment, and brain imaging abnormalities. Associations are strongest for more severe retinal microvascular abnormalities.
Hersi, M. et al.	2017	Canada	2010-2012	146	Systematic Review (SR)	AD	nd	Several factors including statins ,light-to-moderate alcohol consumption, compliance with a Mediterranean diet, higher educational attainment, physically and cognitively stimulating activities, and APOEe2 appeared to be associated with a decreased risk of AD onset. The evidence was suggestive of an increased risk of AD associated with head injury in males, age, diabetes mellitus, conjugated equin…
Hill, et al.	2019	Australia	1.01.1997-12.09.2017	15	SR + MA	AD, MCI, CH	midlife, latelife	Of these, 4 studies found a high-glycemic load was related to an increase in AD biomarker burden; 6 found adherence to a Mediterranean or “AD-protective” dietary pattern conferred a reduction in AD biomarker burden. Meta-analysis revealed a small but significant effect of diet on AD biomarkers (b 1⁄4 0.11 [95% CI 0.04e0.17], p 1⁄4 0.002). This systematic review supports the notion that diet and n…
Hu, C. et al	2017	China	1999-2016	59	SR + MA	D, MCI, AD	Late-life	Senility and gender were concluded to be factors influencing the prevalence and progression of MCI. Age was also identified to be a dominant factor in the progression to dementia.
Hua, Y., et al.	2011	China	1999-2009	27	Meta-analysis (MA)	AD	midlife, latelife	The MTHFR C677T polymorphism is associated with AD in Asian populations, but not in Caucasians
Hua, Y., et al.	2012	China	2000-2009	27	Meta-analysis (MA)	AD	midlife, latelife	this meta-analysis supports the idea that IL-1A –889C/T polymorphism is capable of causing AD and LOAD susceptibility in Caucasians but not in Asians.
Huang, R. et al.	2017	china	any prior 08.2016	19	Meta-analysis (MA)	AD	Late life	This meta-analysis suggests that the RR genotype in saitohin Q7R polymorphism may be a human-specific risk factor for AD, especially among late-onset AD subjects and caucasian populations.
Huckans et al.	2013	USA	1990-2012	14	Systematic Review (SR)	MCI	nd	cognitive rehabilitation therapies can be described as encouraging but inconclusive. Trends show a possible positive effect on the mild cognitve impairement.
Hui et al.	2015	USA	2004-2014	7	Systematic Review (SR)	CI, CD	Late life	Atrial fibrillation was the strongest risk factor for cognitive impairment in a small population of patients with congestive heart failure and it was the only risk factor independently associated with prestroke cognitive impairment.
Iizuka, et al.	2019	Japan	any prior June 2018	20	Systematic Review (SR)	AD, MCI, CH	midlife, latelife	Of the 20 studies, 13 showed improvement in some cognitive domain. In 12 of these 13 studies, the intervention effects were not observed in a specific cognitive domain; rather, the intervention effects were observed across multiple cognitive domains and on working memory. The results of the present review suggest that cognitive function in older adults can be improved through cognitive leisure ac…
Jalilian, et al.	2018	Iran	any prior 1 Nov 2017	20	SR + MA	AD	nd	This systematic review and meta-analysis suggests that occupational exposure to ELF-MF may increase the risk of AD.
Jia, et al.	2019	China	any prior 1 Nov 2018	13	SR + MA	AD, D	midlife, latelife	The results from this study shows that physical activity and exercise can achieve improvement in cognition of elderly with AD and high frequency interventions are not necessarily characterized with greater effects on cogni- tion functions compared to low frequency interventions, we still need to find out the threshold of physical activity and exercise that could exert a positive effect on cogniti…
Jiang, Y. et al..	2019	China	2010-2018	16	Systematic Review (SR)	D	midlife, latelife	Faster global cognitive decline risk was observed in participants with lower concentrations of acylcarnitine, alpha-aminoadipic acid (α-AAA)), valine, or higher concentrations of sphingomyelins (SM) and phosphatidylcholines (PC) at baseline.
Jin, C. et al.	2012	China	nd	3	Meta-analysis (MA)	AD	nd	the A allele of the CR1 SNP rs6656401 is significantly associated with LOAD susceptibility in Chinese Han populations.
Julien, j. et al.	2017	Canada	1985-2016	18	SR + MA	AD	midlife, latelife	we did not determine whether traumatic brain injury (TBI )is a risk factor for AD ,and the inconsistencies found in the literature may be related to methodological problems. To clarify this link, future studies must use a prospective design, define types and severity of TBI and use standardized AD and TBI diagnostic criteria.
Jun, G. et al.	2010	USA	nd	12	Meta-analysis (MA)	AD	midlife, latelife	CR1, CLU, and PICALM are AD susceptibility loci in European ancestry populations. Genotypes at PICALM confer risk for AD predominantly in APOE å4– positive subjects. Thus, APOE and PICALM synergistically interact.
Keage, et al.	2009	UK	nd	6	Systematic Review (SR)	D	Late life	CAA (cerebral amyloid angiopathy) prevalence in populations is consistently higher in the demented as compared to the non-demented. This supports a significant role for CAA in the pathogenesis of dementia.
Kelly, M. E. et al	2017	Ireland	2000-2017	39	Systematic Review (SR)	CH	midlife, latelife	The results support prior conclusions that there is an association between social relationships and cognitive function but the exact nature of this association remains unclear.
Killin, L.O.J. et al	2016	UK	any prior 2016	60	Systematic Review (SR)	D	nd	There is at least moderate evidence implicating the following risk factors: air pollution; aluminium; silicon; selenium; pesticides; vitamin D deficiency; and electric and magnetic fields.
Kivimaki, et al.	2019	UK	any prior Jan 16, 2018	19	SR + MA	CH, D, AD	18 and above	Physical inactivity was consistently associated with increased risk of incident diabetes (hazard ratio 1.42, 1.25 to 1.61), coronary heart disease (1.24, 1.13 to 1.36), and stroke (1.16, 1.05 to 1.27). Among people in whom cardiometabolic disease preceded dementia, physical inactivity was non-significantly associated with dementia or Alzheimer's disease.
Klimova, et al.	2018	Czech Republic	2010-2015	45	Systematic Review (SR)	AD	midlife, latelife	The results of this study confirm that diabetes and AD share some common pathophysiological mechanisms [42]. T2DM is a risk factor of AD, however, the values of this risk are relatively low.
Kobayashi-Cuya, et al.	2018	Japan	Jan 1990-Dec 2016	22	Systematic Review (SR)	CI	midlife, latelife	Handgrip strength associates with cognitive performance cross- sectionally and longitudinally; however, it is unclear to speculate which variable—having weak handgrip strength or having low cognitive performance at baseline—affects the other in the long- term. The studies using the full scores of the cognitive tests found that handgrip strength performance was significantly lower in the cognitive…
Kopf et al.	2009	Germany	any prior 2009	11	Systematic Review (SR)	AD	nd	Diabetes mellitus is likely to increase the risk of Alzheimer’s disease. The association of Alzheimer’s disease and diabetes mellitus is more clear-cut, if mild cases of diabetes mellitus are included in the analysis.
Koyama, A., et al.	2012	USA	nd	14	SR + MA	D, CD	Late life	Lower AB42: AB40 ratios were significantly associated with development of AD and dementia
Koyama, A., et al.	2013	USA	2002-2011	7	Meta-analysis (MA)	D, AD	midlife, latelife	An increased peripheral level of inflmmatory markers is associated with a modest increase in risk of all-cause dementia
Krishna, et al.	2019	India	any prior Feb 2019	11	Systematic Review (SR)	CH	midlife, latelife	A modest association of lower birth weight with lower cognitive abilities in late life is consistent with persisting effects of the prenatal environment on brain function. Of these 11 studies, eight indicated that lower birth weight is a risk factor for lower cognitive function in late life, at least in high‐income countries.
Kueper J.K. et al.	2017	Canada	2017	37	SR + MA	D	midlife, latelife	Conclusion: lower limb motor function was associated with increased risk of developing dementia, while tremor and hand grip strength were not.
Kuiper et al.	2015	Netherlands	nd	19	SR + MA	AD, D, CD	late life	This meta-analysis shows that people with less social participation, less frequent social contact and more feelings of loneliness have an increased risk to develop dementia
Kuiper et al.	2016	netherlands	Any prior 9 July 2012	43	SR + MA	CH, CD	18 and above	This present systematic review provides evidence that multiple aspects (i.e. structural, functional and a combination) of poor social relationships are associated with cognitive decline. The main- effect hypothesis suggests that social relationships have a protective effect on health through several pathways.
Kunkle, B., et al..	2019	USA	nd	21,982 cases	Meta-analysis (MA)	AD	late life	We confirm 20 previous LOAD risk loci and identify five new genome-wide loci (IQCK, ACE, ADAM10, ADAMTS1, and WWOX), two of which (ADAM10, ACE) were identified in a recent genome-wide association (GWAS)-by-familial-proxy of Alzheimer’s or dementia. Fine-mapping of the human leukocyte antigen (HLA) region confirms the neurological and immune-mediated disease haplotype HLA-DR15 as a risk factor for…
Kuzma, et al.	2018	UK	any prior Feb 2017	18	Systematic Review (SR)	D, AD, CI, CH	midlife, latelife	There is convincing evidence for a causal association of shorter telomeres with higher AD risk. Uncertainties remain regarding other modifiable risk factors as existing MR studies do not in themselves provide convincing evidence for a causal link.
Kwok et al.	2011	UK	nd	15 (46637)	SR + MA	AD, MCI, D, VD	midlife, latelife	In this meta-analysis, the overall pooled estimates suggest that there is an increased subsequent risk of dementia in patients with AF (atrial filibration) at baseline, but with substantial heterogeneity in the estimates. Subgroup analysis based on studies that focused solely on patients with stroke indicates that this overall increased risk of dementia in people with AF is primarily driven by th…
Lafortune, L. et al	2016	UK	any prior 2000	164	Systematic Review (SR)	D	midlife, latelife	There is consistent evidence that PA in mid-life is associated with lower risk of dementia or better cognitive function in later life. There is limited evidence that ‘healthy’ diet or dietary patterns in mid-life is related to dementia and cognitive functioning in later life. There is strong evidence demonstrating the association between smoking in mid-life and dementia, or cognitive decline, in …
Lai, Y. et al.	2016	usa	any prior 07.2015	8	SR + MA	D	midlife, latelife	Patients with BP were significantly more likely to have (...) dementia (RR 4.46, 95% CI: 3.23–6.16).
Lam, E. et al.	2017	canada	1946-2016	15	Systematic Review (SR)	CI	midlife, latelife	Sleep-disordered breathing (SDB) has been associated with cognitive impairment in older individuals.
Lancaster, C. et al.	2017	UK	1993-2016	36	SR + MA	CI	young adulthood and mid life	The average effect size of APOE ε4 status was non-significant across cognitive domains. Further consideration of genotype effects indicates preclinical effects of APOE ε4 may be observable in memory and executive functioning
Last, N. et al.	2017	canada	any prior 2016	13	Systematic Review (SR)	NONE	nd	All studies reported significant increases in grey matter volume in the meditators/intervention group, albeit in assorted regions of the brain
Lee et al.	2010	Korea	any prior 2008	37	Systematic Review (SR)	CD, CI, D	18 and above	Results from the overview of research activities in this area indicate that physical activity, nonsmoking, moderate alcohol drinking, maintenance of normal body weight, and a healthy diet may confer some protection against cognitive decline and dementia by reducing the risk or delaying the onset.
Lee J.	2018	Korea	Jan 1990 - Dec 2017	44	SR + MA	D, AD, VD	18 and above	Participation in physical activity was associated with a decreased risk of dementia, whereas physical inactivity was associated with an increased risk. Physical activity performed for at least 1 hour twice per week has been shown to reduce risk of dementia. Other amounts of regular exercise as well as gardening also help decrease dementia risk.
Lehert et al.	2015	Belgium	any prior 2015	24	SR + MA	CH	midlife, latelife	Results suggested that the Mediterranean diet supplemented by olive oil and tai chi exercise may improve global cognition, and the Mediterranean diet plus olive oil and soy isoflavone supplements may improve memory. Cognitive training may have cognitive benefit as well.
Lekoubou et al.	2014	USA	any prior 2013	144	Systematic Review (SR)	D	Late life	This review summarizes the body of literature on neurodegenerative disorders in sub-Saharan Africa:, which is large with regard to Dementia and HIV-related neurocognitive disorders . Major risk factors of Alzheimer Disease include an advanced age, female sex, a low schooling, family background and rural residence. Additionally Increasing risk factors: low body mass index, hypertension, social iso…
Leng, Y et al	2017	US	any prior 2017	14	SR + MA	CI, AD	midlife, latelife	Sleep-disordered breathing is associated with an increased risk of cognitive impairment and a small worsening in executive function
Lennon, et al.	2019	Australia	nd	7	SR + MA	AD	midlife, latelife	Our study found that midlife stage 1 and stage 2 457 systolic hypertension was associated with increased 458 risk of AD by 18 and 25%, respectively, but no asso- 459 ciation was found for diastolic hypertension.
Li, J. et al	2017	China	any prior 2015	10	Systematic Review (SR)	AD	Late life	Current evidence indicates that the link between diabetes and cognitive decline in patients with AD is uncertain.
Li, J.-O. et al	2016	China	1966 - 2015	91	SR + MA	MCI, AD	Late-life	Patients with MCI with APOEε4, abnormal CSF τ level, hippocampal and medial temporal lobe atrophy, entorhinal atrophy, depression, diabetes, hypertension, older age, female gender, lower MMSE score and higher ADAS-cog score, had a high risk for the progression to AD.
Li, M. et al.	2012	China	nd	16	Meta-analysis (MA)	AD	nd	Our results suggested that CYP46A1 rs754203 is a minor risk factor for AD
Li, Y. et al.	2016	china	nd	5 studies (82513 cases)	Meta-analysis (MA)	AD	Late life	However, meta-analysis of 82513 individuals confirmed that rs2883490 within PTK2B increased the risk of LOAD (OR=1.09, 95%CI=1.07-1.12). Additionally, when these data were stratified by APOEε4 status, the difference of allele frequency was evident in APOEε4 carriers
Li, Y. et al.	2017	China	1990-2015	32	SR + MA	D, AD	Late-life	The findings from this meta-analysis indicate that head injury is associated with increased risks of dementia and AD.
Liapis,J. et al	2017	Australia	any prior 2015	9	Systematic Review (SR)	D	midlife, latelife	Findings show an association between computer use in older age and decreased risk of dementia and provide preliminary evidence that computer-based activity interventions are feasible and enjoyable for people with dementia.
Lin, M., et al.	2012	China	nd	39	Meta-analysis (MA)	AD	Late life	The synthesis of available evidence supports mutant of HFE H63D polymorphism plays a protective role for AD risk. For C282Y polymorphism, we did not find any association
Lin, Y., et al.	2014	China	2001-2013	35	Meta-analysis (MA)	AD	Late-life	This meta-analysis suggested A allele of rs6265 might increase the risk of AD in Caucasian females and female LOAD patients. In addition, no evidence indicated an association between rs2030324 with AD.
Liu, B., et al.	2012	China	1999-2010	18	Meta-analysis (MA)	VD	midlife, latelife	results support a genetic association between ApoE polymorphism and VD in the Chinese population.
Liu, H., et al.	2009	China	1998-2007	10	Meta-analysis (MA)	VD	midlife, latelife	The angiotensin-converting enzyme insertion/deletion polymorphism might be neutral to vascular dementia
Liu, H., et al.	2010	China	1998-2009	11	Meta-analysis (MA)	VD	midlife, latelife	This meta-analysis demonstrated that the MTHFR T allele or TT genotype had anv increased risk for VaD in general populations and a significant association was found in allele contrast, recessive, and dominant model in Asian populations, but not in Caucasian populations.
Liu, Q.-P. et al	2015	China	1966 - 2014	11	SR + MA	CD, D	18 and above	The present study suggests that higher coffee consumption is associated with reduced risk for Alzheimer disease.
Liu, S.Y., et al.	2013	China	2005-2010	6	Meta-analysis (MA)	AD	Late life	This meta-analysis showed the risk role of the -2578 polymorphism and the protective role of the -1154 polymorphism when the APOE є4 status was negative, suggesting that the two polymorphisms in the VEGF promoter may have opposing effects on AD risk in an APOE є4- independent manner.
Liu, X. et al.	2012	China	1996-2010	18	Meta-analysis (MA)	VD	midlife, latelife	These results suggest that ApoE polymorphism is significantly associated with susceptibility to vascular dementia in Chinese population. The subject with at least one e4 allele or E4/E4 genotype has higher risk suffering from vascular dementia than others.
Liu, Y. et al.	2016	china	any prior 05.2015	13	Meta-analysis (MA)	AD	nd	In conclusion, our meta-analysis indicated CHAT rs2177369 polymorphism might play a protective role in AD, while rs3810950 variant was a risk factor for AD but its single heterozygous mutations might not influence susceptibility to AD.
Lo, J.C. et al	2016	Singapore	1990 - 2014	18	SR + MA	CH	midlife, latelife	These findings establish self-reported extreme sleep duration as a risk factor for cognitive aging.
Loef et al.	2013	Germany	any prior 2011	13	Meta-analysis (MA)	D,AD	midlife, latelife	Obesity in midlife increase the risk of AD/dementia. Obesity in later life reduced the risk of AD/ dementia.
Loef et al.	2012	Germany	any prior 2011	57	Systematic Review (SR)	D, AD, CI, CD	midlife, latelife	The current state of evidence does not allow conclusions to be drawn on whether supplementation of Zn is beneficial for the prevention or treatment of AD, although a subclinical deficiency appears common in the elderly and subjects with AD.
Loef, Walah	2013	Germany	any prior 2012	14	Systematic Review (SR)	D,AD, CD	midlife, latelife	Association between the omega-6=omega-3 ratio, cognitive decline, and incidence of dementia was found. The replacement of foods that are rich in n-6 FA, including vegetable oils, cereal-based products, and animal based foods, may consequently lower the ratio and thus reduce the risk of dementia.
Loef, Walah a.	2012	Germany	any prior 2011	9	Systematic Review (SR)	D, AD, CI, CD	Late life	Increased intake of vegetables is associated with a lower risk of dementia and slower rates of cognitive decline in older age. Yet, evidence that this association is also valid for high fruit consumption is lacking.
Loef, Walah b.	2012	Germany	any prior 2011	101	Systematic Review (SR)	D, AD, CI, CD	nd	In conclusion, the current trials provide no conclusive evidence that depletion or supplementation of Cu or Fe is beneficial for AD
Low et al.	2013	Australia	1970-2012	15	SR + MA	D,MCI,AD	Late life	Higher neuroticism has a substantial impact on increasing dementia risk, and higher conscientiousness is protective against dementia
Lu, F.P. et al.	2009	Taiwan	1999-2006	15	SR + MA	AD, D	midlife, latelife	The pooled risk for all dementia, Alzheimer’s disease, and vascular dementia were 1.4 to 2.4 times higher in older diabetic adults compared to non-diabetics.
Lu, Y. et al.	2014	China	1994-2007	11	Meta-analysis (MA)	AD	nd	Our data support that the CYP2D6*4 polymorphism but not CYP2D6 phenotypes might be associated with increased AD risk, particularly in Caucasian populations
Lu, Y. et al.	2016	china	any prior 11.2015	19	SR + MA	AD	nd	The current meta-analysis suggested that CALHM1 rs2986017 might be associated with increased AD risk in Caucasian, but not Asian population.
Luccetta, et al.	2018	Brasil	no limits	11	SR + MA	CH	18 and above	The results of the main meta‐analysis suggest that benzodiazepines can be a risk factor for developing dementia (odds ratio 1.38, 95% confidence interval 1.07–1.77; I 2 = 98%; 95% prediction interval 0.58–3.25; very low certainty).
Luck et al.	2010	Germany	1995-2009	9	Systematic Review (SR)	MCI	midlife, latelife	Possible risk factors for incident MCI were analysed only to a limited extent in most of the included studies. However, a higher risk of incident MCI was particularly found for higher age, lower education and hypertension, but not for gender.
Lv, W. et al.	2016	china	any prior 03.2015	7	SR + MA	AD	nd	This meta-analysis supports that low plasma testosterone level is significantly associated with increased risk of Alzheimer’s disease in the elderly men. Low testosterone level is a risk factor of worse cog- nitive function in the elderly men.
M. P. Pase	2011	Australia	2007-2011	6	SR + MA	D	midlife, latelife	Aortic stiffness was found to predict cognitive decline in both qualitative review and quantitative analysis
Ma, L. et al.	2014	China	nd	6	SR + MA	AD	midlife, latelife	patients with a history of cancer had a 37% decreased risk of AD
Ma, Q-P. et al.	2016	China	any prior 2015	26	Meta-analysis (MA)	CI, MCI, CD	midlife, latelife	In conclusion, we meta-analyzed 26 observational studies and found that daily tea drinking could decrease the risk of CoI,MCI and cognitive decline in elderly. However, no association was found between tea intake and AD.
Maclullich et al.	2009	Scotland	2003-2008	9	Systematic Review (SR)	CI	late life	The current evidence indicates a strong link between delirium and LTCI (Long Termin Cognitive Impairment).
Makin et al.	2013	UK	1991-2012	24	SR + MA	D,MCI	late life	Cognitive impairment appears to be common after lacunar strokes despite their small size. Approximately 30% of patients will be cognitively impaired in the 4 years following a lacunar stroke. It is similar to the 23% of non-lacunar stroke.
Manley, G. et al	2017	US	any prior 2016	47	Systematic Review (SR)	CI	late-life	Multiple concussions appear to be a risk factor for cognitive impairment and mental health problems in some individuals. More research is needed to better understand the prevalence of chronic traumatic encephalopathy and other neurological conditions and diseases, and the extent to which they are related to concussions and/or repetitive neurotrauma sustained in sports.
Mattishent, K. et al	2016	UK	2005-2015	12	SR + MA	CD	midlife, latelife	Our meta-analysis shows a bi-directional relationship between cognitive impairment and hypoglycaemia in older patients. Glucose-lowering therapy should be carefully tailored and monitored in older patients who are susceptible to cognitive decline.
McCuloch, S. et al	2016	UK	2001 - 2015	8	Systematic Review (SR)	MCI, D	18 and above	There are health benefits to the individual with dementia or mild cognitive impairment of continuing to engage in meaningful occupation
McGrattan, A. et al.	2021	UK	any prior 11.2019	78	Systematic Review (SR)	MCI	midlife, latelife	Risk of MCI was associated with demographic (e.g., age), health (e.g., cardio-metabolic disease), and lifestyle (e.g., social isolation, smoking, diet and physical activity) factors.
McGuinness et al.	2009	UK	any prior 2008	4	SR + MA	CI, CD	late life	There is no convincing evidence from the trials identified that blood pressure lowering in late-life prevents the development of dementia or cognitive impairment in hypertensive patients with no apparent prior cerebrovascular disease.
Meade T. et al.	2017	Australia	1994-2016	15	Systematic Review (SR)	CI	midlife, latelife	individuals with RA significantly under-performed on cognitive function tests compared to the control groups; particularly on verbal function, memory, and attention. Some demographic (age, education), clinical (disease activity) and psychological (depression) factors were associated with CI but inconsistently
Mendonça, M.D. et al	2016	Portugal	2008 - 2014	17	Systematic Review (SR)	D	midlife, latelife	There is robust epidemiological evidence that SCC/SMI could represent, in a small group of subjects, a status with higher risk of progression to objective cognitive impairment
Meng et al.	2012	Canada	1980-2011	133	Meta-analysis (MA)	CR, AD, VD, D, CD	Late life	The present study demonstrates robust evidence that a high level education in early life is related with a significant reduction both in the prevalence and incidence of dementia, including AD and VaD.
Meng et al.	2014	China	1966-2014	16 for MA; 24 for SR	SR + MA	AD, D	midlife, latelife	The results of the study strengthen the epidemiological evidence that Vascular Risk factors (VRFs)( high blood pressure, hypercholesterolemia, diabetes mellitus, obesity) in midlife as well as smoking significantly increase risk for Alzheimer Disease in late life.
Moran et al.	2014	UK	1993-04.2013	15	Systematic Review (SR)	CI	midlife, latelife	Results suggest high levels of cognitive impairment and depression postTIA/minor stroke which decreased over time. Significantly higher frequencies of cognitive impairment were observed in minor stroke participants compared with TIA participants.
Moroni, F. et al.	2016	italy	any prior 09.2015	15	SR + MA	D	midlife, latelife	The widespread use ofbrain imaging has led to increased recognition of subclinical brain abnormal- ities, including white matter hyperintensities (WMH) and silent brain infarctions (SBI), which have a vascular origin, and have been associated to a high risk of stroke, disability and dementia.
Morra et al.	2012	USA	2000-2010	87	Systematic Review (SR)	CD	midlife, latelife	The study found that the majority of the most frequently cited literature does not adequately account for the contribution of cerebrovascular risk factors and therefore, it is possible that many conclusions about normal aging and cognition are flawed or incomplete.
Mourao, R. J.et al	2015	Brazil	1999 - 2015	16	SR + MA	MCI, D	nd	Depressive symptoms determine an additive risk for progression to dementia in subjects with mild cognitive impairment.
Mukadam, N.et al	2017	UK	1946-2016	13	SR + MA	CD, D	Late life	We did not find evidence that bilingualism, when appropriately adjusted for education, protects from cognitive decline or dementia. Public health policy should therefore remove recommendations regarding bilingualism as a strategy to delay dementia and instead concentrate on more generally reducing cognitive inactivity.
Muñoz Fernández, S.S. et al	2017	Brasil	nd	36	SR + MA	AD	18 and above	Isolated nutrient supplementations show no convincing evidence of providing a significant benefit on clinical manifestations or europathology of AD. During the initial stages of AD, nutrient supplementation did not show any effect when delivered individually, probably because of their synergistic function on brain, at different domains.
Nader, et al.	2018	Brazil	Jan 2010 - Sept 2016	56	Systematic Review (SR)	CI	young adulthood and mid life	Analysis of the studies included in this systematic review suggests evidence of subtle changes associated with regular cannabis use in cognition as well as in brain struc- ture and function in adults.
Naismith, et al.	2018	Australia	1.01.2016-31.10.2017	12	Systematic Review (SR)	MCI, CD	nd	Neurophysiologically, sleep disturbance in MCI appears to be associated with diminished sleep spindles, key processes involved in overnight memory consolidation. Those with both MCI and sleep disturbance appear to have more pronounced functional connectivity alterations in temporoparietal brain regions and higher levels of the wake-promoting neurotransmitter orexin in cerebrospinal fluid than tho…
Niu, et al.	2018	China	any prior 30 April 2017	27	SR + MA	AD	midlife, latelife	Cigarette smoking may confer an increased risk of AD, and the effect of cigarette smoking on AD has tended to be stable over time.
Ojagbemi, A. et al.	2016	Nigeria	any prior 10.2015	12	systematic Review (SR)	D CI	midlife, latelife	Overall, the studies pre- sented low to moderate level evidence suggesting an association between post-stroke delirium and dementia.
Oldham, M, et al.	2018	usa	1981-2016	12	Meta-analysis (MA)	CD	midlife, latelife	Heart valve surgery is associated with cognitive decline over the 6 months after surgery, but outcomes beyond 6 months are unclear.
Oliveira, et al.	2019	Brazil	no limits	4	Systematic Review (SR)	CH, AD, MCI, D	Late life	Adjusted analyses showed that in all studies people with low levels of HL had a significantly higher risk of incident dementia over time than people with adequate levels of HL. Low HL or total literacy (financial plus HL) was also a risk factor for mild cognitive impairment in two studies, irrespective of an Alzheimer’s disease genotype. There was a statistically significant positive association …
Pal, et al.	2018	UK	any prior 20.03.2018	15	SR + MA	MCI, D, AD	Late life	In diabetes, a longer duration of diabetes and the pres- ence of retinopathy were associated with an increased risk of progression, while the use of statins and oral hypoglycaemic agents reduced the risk. Having multiple cardiovascular risk factors was a significant risk factor for progression from MCI to dementia in people with MetS. Diabetes and MetS were both associated with an increased incid…
Pan et al.	2014	USA	any prior 2014	27	Systematic Review (SR)	AD, CD, CI	18 and above	Obstructive sleep apnea (OSA) induces neurodegenerative changes as a result of two major contributing processes: Sleep fragmentation and intermittent hypoxia. As such, inflammation and cellular stress are sufficient to impair cell–cell interactions, synaptic function, and neural circuitry, leading to a decline of cognitive behavior. Sustained OSA could promote cognitive dysfunction, overlapping w…
Pedditizi, E. et al	2016	UK	any prior 2014	21	SR + MA	D	midlife, latelife	this systematic review and meta-analysis suggests a positive association between obesity in mid-life and later dementia but the opposite in late life. Whether weight reduction in mid-life reduces risk is worthy of further study.
Pendlebury et al.	2009	UK	1950-2009	73	SR + MA	D	late-life	The prevalence of dementia are consistent: 10% of patients had dementia before first stroke, 10% developed new dementia soon after first stroke, and more than a third had dementia after recurrent stroke. The strong association of post-stroke dementia with multiple strokes and the prognostic value of other stroke characteristics highlight the central causal role of stroke Medial temporal lobe atro…
Penninkilampi, R. et al	2018	Australia	2012-2017	31	SR + MA	D	late-life	we found evidence that poor social engagement was associated with an increased risk of dementia. Good social engagement could not be conclusively associated with reduced dementia risk, and there was a non-significant trend for loneliness conferring an increased risk.
Perez et al.	2012	USA	nd	14	Systematic Review (SR)	VD, CI, CD	midlife, latelife	These components included antioxidants, lipids, homocysteine, folate, vitamin B12, and fish consumption. antioxidants, specifically Vitamin e and c, and fatty fish intake were found to be protective against Vad risk. Fried fish, elevated homocysteine, and lower levels of folate and vitamin B12 were associated with increased Vad. evidence for dietary lipids was inconsistent, although elevated midl…
Peters et al.	2015	UK	any prior 2013	8	Systematic Review (SR)	CI, CD, AD, VD	midlife, latelife	This systematic review highlights that there is some evidence of a potential association between air pollution and subsequent cognitive decline.
Peters, et al.	2019	Australia	any prior 26 April 2018	13	Systematic Review (SR)	CH, AD, MCI, D	midlife, latelife	Our summary of the current evidence base suggests that first body mass index and then blood pressure rises and then falls more steeply in those who go on to develop dementia. The evidence for cholesterol was less consistent.
Petersson, S.D. et al	2016	UK	any prior 2015	32	Systematic Review (SR)	CH, D	midlife, latelife	Based on the findings and the limitations in study design, we conclude that adherence to the Mediterranean diet is associated with better cognitive performance. However, it should be noted that the majority of findings come from epidemiologic studies that provide evidence for a correlation between the MD and cognition but not for a cause-and-effect relation.
Piazza-Gardner et al.	2013	USA	No limit	19	systematic Review (SR)	AD, D	midlife, latelife	Of the studies assessing the impact of alcohol consumption on AD, nine identified no association, seven suggested a decreased risk, and three others suggested an increased risk. Taken together, the current literature base does not provide adequate evidence for a concrete cause–effect association between alcohol and AD.
Plassmann et al.	2010	USA	1984-2009	165	Systematic Review (SR)	D, AD, VDC, CI, CD	midlife, latelife	Cognitive decline in later life has numerous causes, and each may be associated with different risk or protective factors. Although interventions or lifestyle modifications should presumably be done as early as possible, a given intervention may exert its effect during other times in a person’s life.
Power et al.	2011	USA	nd	18	SR + MA	AD	midlife, latelife	This systematic review and meta-analysis of prospective epidemiologic research does not provide clear evidence for a relationship between blood pressure and Alzheimer disease. Weak evidence for age effect: There is a suggestion that midlife diastolic, but not midlife systolic, hypertension in midlife may have an adverse effect on risk of incident Alzheimer disease and a suggestion that elevated l…
Proietti et al.	2014	Italy	nd	3	Systematic Review (SR)	CI	mid-life and late-life	Cognitve impairment and related negative consequences have been largely documented in patients with heart failure but very few studies have assessed the plausible benefits of CRT on patients’ cognitive function.
Purnell et al.	2009	USA	2000-2009	23	Systematic Review (SR)	AD	nd	In conclusion, there is limited evidence that single cardiovascular risk factors affect AD risk, but the strength of the association is influenced greatly by changing the parameters of the risk factors and in particular by identifying interactions between the factors
Qin	2012	China	nd	32	Meta-analysis (MA)	AD	nd	"The present meta-analysis suggests that the IL-1A is a candidate gene for AD susceptibility. The IL-1A -889C/T889C/T polymorphism may be a risk factor for AD in Caucasians."
Quinn	2011	UK	nd	21	Meta-analysis (MA)	D, VD, CD	nd	In two longitudinal studies, the incident of vascular dementia risk was greater for higher D-dimer. Higher levels of: factor (F)VII, fibrinogen , prothrombin fragment 1 and 2, plasminogen activator inhibitor, D-dimer and von Willebrand factor (VWF) showed modest but significant associations with vascular dementia. For patients with any dementia diagnosis, associations were with higher D-dimer and…
Rai, V.	2017	India	any prior 2015	41	Meta-analysis (MA)	AD	nd	Results of present meta-analysis supported that the MTHFR C677T polymorphism was associated with an increased risk ofAD.
Rayes, H. et al.	2018	Canada	1946-2015	78	SR + MA	CI	nd	The relative risk for CD in SLE was greater when compared to RA and to healthy individuals; RR being 1.80 and 2.80 respectively.
Rensma, S. et al.	2018	netherlands	any prior 2017	28	SR + MA	D	nd	WMHs and lacunes of presumed vascular origin, , perivascular spaces, and total cerebral atrophy (but not cerebral microbleeds) were associated with incident dementia
Ryman et al.	2014	USA	nd	140	SR + MA	AD	nd	Significant proportions of the observed variance in age at symptom onset in autosomal dominant Alzheimer disease (ADAD) can be explained by family history and mutation type (amyloid precursor protein, presenilin 1, presenilin 2), providing empirical support for use of these data to estimate onset in clinical research.
Sajeev,G. et al	2016	US	any prior 2014	12	Systematic Review (SR)	AD, D	midlife, latelife	Our systematic review and bias analyses provide support for the hypothesis that late-life cognitive activity offers some reduction in AD and all-cause dementia risk.
Sakusic, A. et al.	2018	Bosnia and Herzegovina	any prior 2017	28	Systematic Review (SR)	CI	nd	Delirium and duration of delirium were associated with long-term cognitive impairment after ICU admission. Weaker associations have been reported with hypoglycemia, hyperglycemia, fluctuations in serum glucose levels, and in-hospital acute stress symptoms. Instead, most ofthe studies did not find significant associations between long-term cognitive impairment and mechanical ventilation; use of se…
Santaba ́rbara, et al.	2018	Spain	any prior January 2018	5	SR + MA	CH, D	midlife, latelife	Across 6 cohorts, individuals with anxiety showed a statistically significant 29% increased risk of dementia compared to individuals without anxiety. Further, a subgroup analysis suggested that anxiety was a risk factor for dementia independent from depression.
Savva et al.	2010	UK	any prior 2008	16	Systematic Review (SR)	D	midlife, latelife	A history of stroke confers approximately a doubling of the risk of dementia incidence in the population aged 65 years.
Seifan et al.	2015	USA	1970-2014	43	Systematic Review (SR)	AD	nd	Early risk factors for AD may alter brain anatomy, causing vulnerability to AD-related dementia later in life. In the perinatal period, both genes and learning disabilities have been associated with the development of distinct AD phenotypes. During early childhood, education and intellect as well as body growth may predispose to AD through alterations in cognitive and brain reserve. Childhood soc…
Seitz et al.	2011	Canada	1980-2010	15	SR + MA	AD, D	midlife, latelife	There was no significant association between any exposure to GA and risk of AD. There was also no significant association between GA and risk of AD in several subgroup and sensitivity analyses.
Sekhon, et al.	2019	Canada	1.01.2013-31.12.2018	11	SR + MA	D, SCI, MCI	late life	MCR predicts cognitive impairment and dementia, suggesting that it may be used as a screening syndrome for dementia in a primary care setting. MCR was also found to be associated with low grey matter volume involving the premotor and the prefrontal cortex, and lacunar lesions in the frontal lobe.
Sharp et al.	2011	UK	any prior 2011	11	SR + MA	VD	midlife, latelife	Hypertension significantly increases the risk of vascular dementia.This systematic review shows that people with either a history of midlife hypertension or a current measurement of hypertension have nearly twice the risk of developing vascular dementia compared to people without hypertension.
Sharp et al.	2011	USA	1985-2010	71	Systematic Review (SR)	AD, D	midlife, latelife	Overall, the results of this review suggest that the education-dementia relationship may be more complex than previously suggested in the aging literature. The results suggest that lower education is associated with an increased risk for dementia for some but not all studies.
Shen, L. et al	2015	China	any prior 02.2015	10	Meta-analysis (MA)	AD, D	late-life	Available data indicates that lower vitamin D status may be associated with increased risk of developing AD and dementia
Shen, Z. et al.	2017	china	1990-2015	27	Systematic Review (SR)	CI	late-life	we show clear evidence for a relationship between chronic kidney disease and frailty and cognitive impairment inmajor studies
Shi L. et al.	2015	Hongkong	nd	24	Meta-analysis (MA)	AD	midlife, latelife	A new graphical meta-analysis method, namely the Probabilistic Entity-Relationship Diagram (PERD), is introduced in this paper. It is designed as a color map with nodes (biomarkers) and edges (correlations) showing the relationship of reported contributing factors resulting in preclinical AD.
Shi, Y. et al.	2018	China	any prior 28 October 2016	18	SR + MA	D, AD, VD	midlife, latelife	Compared with individuals without sleep disturbances, subjects who reported sleep disturbances had a higher risk of incident all-cause dementia, AD, and vascular dementia. The subgroup analysis showed that insomnia increased the risk of AD but not vascular or all-cause dementia. In contrast, SDB was associated with a higher incidence of all-cause dementia, AD, and vascular dementia. This meta-ana…
Siervo et al.	2011	Italy	1966-2010	12	SR + MA	CI	18 and above	A low-order significant effect was found for an improvement in cognitive performance with weight loss in memory and attention/executive functioning. Weight loss appears to be associated with low-order improvements in executive/attention functioning and memory in obese but not in overweight individuals.
Snowden et al.	2011	USA	1985-2008	30	Systematic Review (SR)	CI, AD, D	midlife, latelife	Of the 30 studies reviewed, some had positive outcomes for certain exercise types and cognitive domains, but many found no significant benefits. The panel concluded that the available data from these intervention studies were insufficient for determining whether physical activity or exercise interventions improve cognition in older adults.
Solfrizzi; V. t al.	2017	Italy	2014-2016	47	Systematic Review (SR)	AD,CD	late life	Some evidence suggesting a direct relation between diet and changes in the brain structure and activity. There was also accumulating evidence that combinations of foods and nutrients into certain patterns may act synergistically to provide stronger health effects than those conferred by their individual dietary components. In particular, higher adherence to a Mediterranean-type diet was associate…
Sommer, I. etl al.	2017	Austria	1990-2015	6	SR + MA	D	midlife, latelife	The results of this systematic review show that low vitamin D levels might contribute to the development of dementia
Sommerlad, et al.	2017	UK	any prior 5 Dec 2016	15	SR + MA	D, AD, VD, CH	midlife, latelife	Our study summarised all accessible published evidence and found that people who are lifelong single have a 42% higher risk and that those who are widowed have a 20% higher risk of developing dementia than those who are married in studies adjusted for age and sex. We found no evidence that dementia risk in divorced people differs from married people. Further analyses showed that less education pa…
Song, et al.	2018	China	any prior May 27 2017	53	SR + MA	AD, MCI	Late life	ApoE4, early onset, early appearance of extrapyramidal signs, high education level, and neuropsychiatric conditions might increase the risk of Rapid Cognitive Decline while older age, diabetes, and multidrug therapy were the protective factors for AD.
Spano, M. et al.	2015	Italy	any prior 10.2014	unknown	Systematic Review (SR)	LBD	nd	muataions and polymorphism in both mitochondrial DNA ( mtDNA) and nuclear DNA have been implicated in causing DLB.
Stacey, D, et al.	2017	Australia	no limits	28	Systematic Review (SR)	CI CD	18 and above	We also propose there is a need for a general shift in focus away from the major cytokine-encoding genes more towards cytokine-regulating genes.
Stefanidis, et al.	2018	Australia	any prior 6 June 2016	6	SR + MA	D, AD, MCI, VD, CD	Late life	Both atrial fibrillation and severe atherosclerosis emerged as significant risk factors for cognitive decline and/or dementia. A small set of studies reviewed, insufficient for meta-analysis, examining congestive heart failure, peripheral artery disease and myocardial infarction suggested that these conditions may also be associated with an increased risk of cognitive decline/dementia. In the abs…
Stepehen R., et al	2017	Finland	any prior 2015	24	Systematic Review (SR)	AD	Late life	There seems to be an inverse association between physical activity and the risk of AD, though the overall quality of evidence is moderate. Leisure-time physical activity is particularly protective against AD. It is likely that physical activities that have additional social and cognitive stimulation components may be most effective.
Stewart et al.	2015	USA	any prior 2015	4	Systematic Review (SR)	CI,CD	midlife, latelife	Although several studies demonstrate an association between nutrition and cognitive function in this population, the lack of research in this area points to a clear need for more studies. Findings revealed that poorer nutritional habits were associated with poorer attention, executive functioning, and memory in older adults with heart failure. Nutritional biomarkers, including anemia, hyponatremi…
Stirland, et al.	2018	Scotland	any prior 10 December 2014	9	Systematic Review (SR)	D, MCI, CI	18 and above	Six papers reported an association between increased levels of passive smoking and a form of cognitive impairment. Two papers described an association between passive smoking and dementia. One paper reported no association between passive smoking alone and dementia, but found an association in a sub-group analysis of people with greater than 25 years’ of exposure to passive smoking and more than …
Stocker, et al.	2018	Germany	2010-2018	18	Systematic Review (SR)	CH, MCI, AD	Late life	All GRSs expressed significant associations or discrimination capability of AD when compared to clinically normal controls; however, GRS prediction of MCI to AD conversion was mixed. APOE ε4 status was more predictive of AD than the GRSs, although the GRSs did add to AD prediction accuracy beyond APOE ε4. GRSs might contribute to identifying genetic risk of AD beyond APOE. However, additional stu…
Su, W. et al.	2017	china	any prior 2017	51	Meta-analysis (MA)	FTD	nd	Subgroup analysis revealed significant association between APOE epsilon4 and FTLD (P < 0.01, OR > 1) for the Caucasian, Italian, population based (PB), P > 0.05 value of the Hardy-Weinberg Equilibrium (HWE), Newcastle-Ottawa scale score > 6, and behavioral variant frontotemporal dementia (bvFTD) subgroups. However, there was no significant association between the APOE epsilon2 allele and FTLD (P …
Subota, A. et al.	2017	canada	no limits	3	SR + MA	D	18 and above	The period prevalence ofdementia ranged from 8.1 to 17.5 per 100 persons among persons with epilepsy (insufficient data to pool).
Sun, J.H.	2015	China	1946-10.2014	69	SR + MA	VD	late- life	We identified APOE 2/3/4 and additional four genetic polymorphisms including MTHFR C677T, PON1 L55M, TGF-1 +29C/T, and TNF- −850C/T associated with VaD.
Sun, R. et al.	2019	china	1994-2017	39	Meta-analysis (MA)	D	nd	APOE polymorphisms were significantly associated with Parkinson Disease Dementia risk in the entire case group (E3: OR ¼ 0.72, 95% CI: 0.58-0.89, P ¼ .003; E4: OR ¼ 1.46, 95% CI: 1.12-1.88, P ¼ .004) and in Asian subgroups.
Tada, A .et al.	2017	Japan	2005-2015	33	Systematic Review (SR)	CH, D	midlife, latelife	Most studies point to a positive association between mastication and cognitive function, including dementia among elderly people.
Tan, et al.	2019	Netherlands	any prior March 31, 2018	35	SR + MA	MCI	late life	Depressive symptoms are associated with an increased risk of conversion from MCI to dementia in community- based studies. In contrast, evidence in clinical populations was insufficient with high heterogeneity.
Tonsekar, P.P. et al	2017	US	any prior 2016	16	Systematic Review (SR)	D	midlife, latelife	The literature on chronic periodontitis and multiple tooth loss as risk factors to dementia remains inconclusive.
Udompanich et al.	2013	UK	1990-2012	11	Systematic Review (SR)	CI, CD, D	midlife, latelife	Among cross-sectional studies, patients with AF had a 1.7 (95% CI 1.2-2.5) to 3.3 (95% CI 1.6-6.5) greater risk of cognitive impairment, and a 2.3-fold (95% CI 1.4-3.7) increased risk of dementia, compared to patients in sinus rhythm. ﻿Eight studies reported an association between AF and cognitive impairment and/or dementia, but the magnitude of risk varied.
Ungprasert, P. et al.	2016	Thailand	any prior 08.2015	5	SR + MA	D	nd	We found a significantly increased risk of dementia among patients with RA, with the pooled risk ratio of 1.61
Vagelatos et al.	2013	Australia	No limit	15	SR + MA	CI, AD, D	midlife, latelife	In summary, findings from the present meta-analysis and systematic review support a role for T2DM in the clinical manifestation of AD. ApoE ɛ4 and vascular risk factors such as smoking and hypertension appear to interact with T2DM to increase the risk of developing probable AD.
van Dalen, et al.	2018	Netherlands	any prior 2 October 2017	16	SR + MA	D, MCI, AD	late life	In this systematic review and meta-analysis of 16 studies including 7365 patients, memory clinic patients with apathy had an approximately doubled risk of incident dementia, depending on age and cognitive function. Adjustment for apathy definition and duration of follow-up explained 95% of heterogeneity in patients with mild cognitive impairment; results seem generalizable to memory clinic popula…
Van Dam	2009	Netherlands	1997-2006	9	Systematic Review (SR)	AD	nd	Analysis of prospective cohort studies (2569 subjects) revealed a pooled relative risk for AD in HHcy of 2.5 (1.38–4.56, p < 0.01). No specific randomized controlled trials (RCTs) concerning Hcy-lowering therapy and AD-risk were identified. Prospective studies on the relation between folate, vitamins B6 and B12 levels and the risk of developing AD are warranted, preferably in the form of RCTs.
Van de Rest et al.	2015	Netherlands	any prior 2014	36	Systematic Review (SR)	AD,D, CD	late-life	The results suggest that better adherence to a Mediterranean diet is associated with less cognitive decline, dementia, or AD.
Van den Berg et al.	2009	Netherlands	1990-2008	73	Systematic Review (SR)	CI, CD	18 and above	Diabetes and hypertension were clearly associated with cognitive decrements; the results for obesity and dyslipidemia were less consistent. Effect sizes were moderate (median~−0.3) for all risk factors.
van der Velpen, I. et al.	2017	netherlands	nd	24	Systematic Review (SR)	CI D	midlife, latelife	Available evidence indicates that impaired cardiac hemodynamics and elevated levels of serum cardiac markers are associated with worse cognitive function and need to be considered as red flags for a higher risk of developing de- mentia
van Rijsbergen, M. et al.	2013	Netherlands	any prior 04.2013	26	Systematic Review (SR)	SCI	18 and above	SCC are very common after stroke
van Rooij, F. et al.	2016	netherlands	any prior 05.2015	13	Systematic Review (SR)	MCI VD CI	late-life	Mild cognitive impairment is present in more than a third of the TIA patients and has a profile comparable with vascular cognitive impairment.
van Sloten, T.	2015	Netherlands	any prior 07.2014	41	SR + MA	CI	midlife, latelife	some (but not all) studies showed an association between greater stiffness and cognitive impairment, and the strength of this association was relatively weak.
Veronese, N. et al.	2016	italy	any prior 05.2015	13	Systematic Review (SR)	AD	late life	Compared to HCs, patients with AD had significantly lower Mg in cerebrospinal fluid (2 studies; SMD¼?0.35; P ¼ .02) and in hair (2 studies; SMD¼?0.75; P ¼ .0001). No differences between AD and controls were evident for serum Mg. In conclusion,
Vňuková, M. et al.	2017	czech republic	any prior 2015	4	Systematic Review (SR)	AD CI	18 and above	Smoking decreases GMV in most brain areas. This decrease may be responsible for the cognitive impairment and difficulties with emotional regulation found in smokers compared with non-smokers
Walker, J. et al.	2020	Canada	any prior 06.2019	13	Systematic Review (SR)	D	18 and above	Have found no association between marital status and dementia. Suggestion that supportive environmental factors, such as close-knit familial and social connections, may be protective against ADRD.
Wang, C. et al.	2014	China	1998-2012	8	MA	AD	late-life	Lowered level of blood ApoE in AD patients, and indicates its potential value as risk factor for AD
Wang, H.X. et al.	2012	Sweden	1991-2011	52	Systematic Review (SR)	D, CH	midlife, latelife	a protective effect of mental activity on cognitive decline has been consistently reported in both observational and interventional studies, but the effect on the risk of dementia or AD remains inconsistent from the later studies
Wang, J. et al.	2018	Taiwan	any prior 1 June 2018	6	SR + MA	D, VD, AD, LBD, FTD	18 and above	Our results indicated that any headache was associated with an increased risk of all-cause dementia. Incidentally, headache patients were reported to have an increased risk of white-matter hyperintensity. Therefore, subtle changes in the brain white-matter might contribute to an increased risk of dementia in headache patients.
Wang, X.B. et al.	2014	China	any prior 02.2014	26	Meta-analysis (MA)	AD	late-life	IN common polymorphisms of the angiotensin-converting enzyme gene and sporadic Alzheimer disease (SAD) we observed significant association between SNP rs4291 Association with SNP rs1800764 was revealed. Significant association was not identified in the analysis for SNP rs4343. In subgroup analyses, the risk of SAD associated with SNP rs4291 appeared to be significant among Caucasians and in older…
Wang, X.B. et al.	2015	China	1998-2014	53	Meta-analysis (MA)	AD	nd	In summary, the current meta-analysis suggested that the ACE I/D polymorphism is unlikely to be a major determining factor in the development of SAD ( sporadic alzheimer disease)
Wang, X.J. et al.	2019	China	1.01.1865-1.06.2017	37	SR + MA	CH, D, AD	nd	The pooled results indicated significant associations of dementia with food deficiency (OR = 2.05, 95% CI = 1. 22–3.44), low education level (RR = 1.80, 95% CI = 1.60–2.02), and shorter leg length (OR = 1.19, 95% CI = 1.07–1.32). Other potential risk factors identified in the systematic review include rural residence, number of siblings, history of head trauma, early parental death or re-marriage…
Wang, Y. et al.	2013	China	1993-2012	23	Meta-analysis (MA)	AD	midlife, latelife	The present meta analysis demonstrated that TF gene rs1049296 polymorphism is a genetic determinant of AD.
Wang, Y. et al.	2016	china	any prior 09.2014	8	SR + MA	AD	midlife, latelife	Low thyrotropin level was significantly associated with an increased risk ofAlzheimer’s disease (fixed RR=1.69, 95 % CI 1.31–2.19, P<0.001; I2= 38.0 %). High thyrotropin level was also significantly associ- ated with an increased risk ofAlzheimer’s disease (fixed RR= 1.70, 95 % CI 1.18–2.45, P=0.005; I2=42.2 %) when com- pared with normal thyrotropin level.
Wang, Y. et al.	2017	china	any prior 08.2016	26	Meta-analysis (MA)	AD	late life	In conclusion, our meta-analysis suggested that LRP1 C766T polymorphism was associated with lower risk of AD in Asian, and could reduce LOAD risk especially.
Weber, et al.	2019	Hong Kong	any prior 20 April 2018	6	SR + MA	CH, AD, D, VD	18 and above	The result of our meta-analysis shows an association between Osteoarthritis and increased risk for dementia. The risk slightly increased after pooling for those that adjusted for age and gender, and also after pooling the studies with a STROBE quality score above-equal 75%. Our results provide mounting evidence that OA is not only a local disease but also a systemic- associated disease.
Wu, W. et al.	2013	China	2003-2010	27	Meta-analysis (MA)	AD	late-life	This meta-analysis showed that T allele of rs2227564 polymorphism in PLAU gene could increase the effects on risk of AD
Wu, Y.T. et al.	2015	UK	any prior 2014	15	Systematic Review (SR)	CI, CD, D	midlife, latelife	Fifteen studies have reported on the association between community environment and cognitive function of older people. Some individual level factors (ethnicity, genotype and socioeconomic status, like income) were found to modify the association between community environment and cognitive function.
Wu, S. et al.	2015	China	1965-2013	6	Meta-analysis (MA)	AD,D	midlife, latelife	A higher intake of fish was associated with a lower risk of AD. However, there was no statistical evidence for similar inverse association between long-chain omega-3 fatty acids intake and risk of dementia or AD, nor was there inverse association between fish intake and risk of dementia.
Wu, L. et al	2017a	China	any prior 2016	9	SR + MA	AD, D, CD, CI	midlife, latelife	A "J-shaped" association was presented between coffee intake and incident cognitive disorders, with the lowest risk of incident cognitive disorders at a daily consumption level of 1-2 cups of coffee
Wu, L. et al	2017b	China	2006 - 2010	6	SR + MA	AD, D, CD, CI	midlife, latelife	In summary, the present systematic review and meta-analysis of 6 studies shows an inverse association between fruit and vegetables consumption and the incident risk of cognitive disorders.
Wu, L. et al.	2018	China	any prior 4 May 2016	9	SR + MA	D, AD, CD, CI	late life	Compared with the middle category, both short and long sleep duration were accompanied by a significantly higher incident risk of cognitive disorders. The association between short sleep duration and cognitive disorders was more robust in the subgroup of the measurement of sleep duration based on self-report. The lowest incident risk of cognitive disorders was found at the sleep duration of 7–8 h…
Wu, Z. et al.	2020	Australia	any prior 11.2019	37	Systematic Review (SR)	CH	18 and above	Generally, membership of better classes was predicted by younger age, being female, more years of education, better health, healthier lifestyle, higher social engagement and lack of genetic risk variants. Some factors (e.g., education) were found to be associated with cognitive function over time only within individual classes.
Xu, H. et al.	2017	china	any prior 2015	2300 cases	Meta-analysis (MA)	AD	late life	our results demonstrated that rs5848 poly- morphism within GRNwas associated with LOAD.
Xu, W. et al	2017	China	any prior 2016	16	Meta-analysis (MA)	D	midlife, latelife	Modest alcohol consumption (≤ 12.5 g/day) is associated with a reduced risk of dementia with 6 g/d of alcohol conferring a lower risk than other levels while heavy drinking (≥ 23 drinks/week or ≥38 g/day) would significantly elevate the risk.
Yan, D. et al	2016	China	any prior 2015	7	SR + MA	AD	midlife, latelife	The results of our meta-analysis suggest a significant positive association between pesticide exposure and incidence of AD. These findings provide powerful evidence supporting the hypothesis that pesticide exposure is related to an increased risk of AD.
Yang, et al.	2014	China	any prior 10.2013	10	SR + MA	CD	midlife, latelife	Our analysis demonstrated a weak association between peripheral CRP level and global cognitive decline
Yates, J.A. et al.	2013	UK	no limit	58	Systematic Review (SR)	D, AD, CI, CD, MCI	midlife, latelife	Meta-analyses indicated that symptoms of depression and anxiety were more prevalent in people with MCI than in people with normal cognitive function, and increased the risk of progression from no cognitive impairment to MCI
Yates, L.A. et al	2016	UK	2004 - 2014	19	SR + MA	CI, D	midlife, latelife	There is increasing evidence that participation in cognitively stimulating leisure activities may contribute to a reduction of risk of dementia and cognitive impairment in later life.
Yuan and Wang	2017	China	2003-2016	47	Systematic Review (SR)	CI, CD	midlife, latelife	Results show that the risk of dementia or MCI is higher among people with diabetes than in the general population. Diabetic patients are at more than double the risk of developing Vascular Dementia, and also have higher risk of developing Alzheimer Disease, any dementia, and MCI.
Yuan, H. et al.	2017	China	nd	7	Meta-analysis (MA)	AD	late-life	The present meta-analysis showed that rs1467967A/G, rs3785883G/A, rs2471738C/T, and rs7521G/A polymorphisms were not associated with the risk of SAD. However, rs242557G/A genetic polymorphism was associated with susceptibility to SAD, and individuals with a GG genotype of rs242557G/A might be at a lower risk of SAD (sporadic)
Yuan, Y. et al.	2015	China	2000-2011	11	Meta-analysis (MA)	AD	late- life	Our study provided solid evidence suggesting that ACE gene I/D polymorphism is a genetic risk factor for AD in Chinese population
Yusufuv, M. et al	2017	US	1995 - 2015	64	Systematic Review (SR)	AD	midlife, latelife	The finding that 50 of the 64 reviewed studies revealed an association between diet and AD incidence offers promising implications for diet as a modifiable risk factor for AD. Vitamin C and E supplements should notbe recommended
Zeng, L-F et al	2017	China	any prior 2016	9	SR + MA	CD, D, AD, CI	midlife, latelife	These analyses seemingly confirmed the inverse correlation between fish intake and the risk of Dementia of alzheimer type (DAT), whereby a higher consumption of fish could lower the risk of DAT. However, there was no statistical evidence for a link between n-3 FAs, DHA, or EPA and the risk of cognitive decline.
Zhang, D.M. et al	2017	China	any prior 2015	4	SR + MA	MCI, CI, AD, VC	late life	Vitamin B supplementation was effective in reducing serum homocysteine levels. However, it did not translate into cognitive improvement, indicating that the existing data on vitamin B-induced improvement in cognition by lowering homocysteine levels are conflicting.
Zhang, J. et al	2017	China	any prior 2016	17	Meta-analysis (MA)	AD	nd	The risk of AD is higher among people with diabetes than in the general population, especially in Eastern populations.
Zhang, X. et al	2016	China	any prior 2015	14	SR + MA	CI/CD	nd	Overall, the results from this meta-analysis showed that the risk of cognitive dysfunction was higher among people with COPD than in people without COPD. Further, the exacerbation of COPD was found to be strongly correlated with cognitive decline.
Zhang, Y. et al	2016	China	any prior 2015	21	Meta-analysis (MA)	MCI,CI	18 and above	Fishery products are recommended as dietary sources and are associated with lower risk of cognitive impairment. Marine derived DHA was associated with lower risk of dementia and AD but without a linear dose-response relation.
Zheng, J. et al.	2018	china	2007-2011	4	SR + MA	AD	18 and above	Our results indicate that the low expression of aging-related NRXN3 may increase AD risk, though the potential mechanism requires further clarification.
Zheng, Y. et al	2017	China	2012 - 2014	4	Meta-analysis (MA)	AD, MCI	late life	This meta-analysis suggests that hearing impairment significantly increases the risk of cognitive disorders and future well-designed prospective cohort studies are awaited to confirm the association between hearing impairment and risk of Alzheimer’s disease.
Zhong et al.	2015	China	any prior 2014	37	Meta-analysis (MA)	AD, D, VD, CI, CD	midlife, latelife	Smokers show an increased risk of dementia, and smoking cessation decreases the risk to that of never smokers. The increased risk of AD from smoking is more pronounced in apolipoprotein E ε4 noncarriers.
Zhou, F. et al.	2019	China	1999-2018	29	Meta-analysis (MA)	AD	midlife, latelife	Every 5 μmol/L increase in blood homocysteine is linearly associated with a 15% increase in relative risk of Alzheimer-type dementia
Zhou, J. et al	2015	China	1975-11.2013	9	SR + MA	AD	late life	Stroke significantly and independently increased risk for AD and in turn Ad increased risk for ICH.
Zhou, Q. et al.	2014	China	1994-2011	17	Meta-analysis (MA)	AD	late life	The APOC1 insertion allele, in combination with APOE e4, likely serves as a potential risk factor for developing AD.
Zhou, S. et al.	2019	China	nd	29	SR + MA	AD FTD	nd	This study demonstrates that multiple variants in TREM2 have association with the onset of AD, FTD, and PD in North Americans and also play a key role in the phenotypes of the rare familial genetic disorder.
Zhu, et al.	2018	China	any prior 10 April 2017	6	Meta-analysis (MA)	D, MCI	midlife, latelife	Participants with SDB at baseline had sig- nificantly higher risk of cognitive decline, as indicated by a combined outcome of mild cognitive impairment (MCI) or dementia. Moreover, SDB was associated with a significantly higher risk of cognitive decline in female participants, but not in the males.
Zhu, R. et al.	2017	China	any prior 2015	7	Meta-analysis (MA)	AD	midlife, latelife	In conclusion, the current meta-analysis suggests that the BIN1 SNP rs744373 is associated with susceptibility to LOAD
