# Supplementary material for: What Do We Know about Social and Non-Social Factors Influencing the Pathway from Cognitive Health to Dementia? A Systematic Review of Reviews
Source: Brain Sci. 2022 Sep 8;12(9):1214. doi: 10.3390/brainsci12091214 (PMC9497077; doi:10.3390/brainsci12091214)
Supplement: Supplementary file 1 [file brainsci-12-01214-s001.zip › Table S5. AMSTAR scoring of included studies.xlsx]

## Sheet: Arkusz1
Lenart-Bugla, et al., 2022: What do we know about social and non-social factors influencing the pathway from cognitive health to dementia? A systematic review of reviews.
Supplementary material Table S5: AMSTAR scoring of included studies.
Title	Author (et al.)	Year	1. Was an 'a priori' design provided?	2. Was there duplicate study selection and data extraction?	3. Was a comprehensive literature search performed?	4. Was the status of publication (i.e. grey literature) used as an inclusion criterion?	5. Was a list of studies (included and excluded) provided?	6. Were the characteristics of the included studies provided?	7. Was the scientific quality of the included studies assessed and documented?	8. Was the scientific quality of the included studies used appropriately in formulating conclusions?	9. Were the methods used to combine the findings of studies appropriate?	10. Was the likelihood of publication bias assessed?	11. Was the conflict of interest stated?	total score
Is physical activity a potential preventive factor for vascular dementia? A systematic review	Aarsland, et al.	2010	1	0	1	1	1	1	1	1	1	1	1	10
Association of Apolipoprotein E Genetic Variation in Alzheimer’s Disease in Indian Population: A Meta-Analysis	Agarwal, et al.	2014	1	1	0	1	0	1	0	0	1	1	1	6
Subjective cognitive decline and APOE epsilon4: A systematic review	Ali, et al.	2018	1	1	1	0	1	1	0	0	1	0	1	7
The influence of ApoE4 on clinical progression of dementia: a meta-analysis	Allan, Ebmeier	2010	1	0	1	1	0	1	0	1	1	1	1	7
Updated Meta-Analysis of BIN1, CR1, MS4A6A, CLU, and ABCA7 Variants in Alzheimer's Disease	Almeida, et al.	2018	1	1	0	0	0	1	1	1	1	1	1	8
Can physical activity prevent physical and cognitive decline in postmenopausal women? A systematic review of the literature	Anderson et al.	2014	1	1	1	1	1	1	1	1	1	1	1	11
Association between orthostatic hypotension and cardiovascular risk, cerebrovascular risk, cognitive decline and falls as well as overall mortality: a systematic review and meta-analysis	Angelousi, et al.	2014	1	1	1	1	0	1	1	1	1	1	1	9
Vitamin D insufficiency and cognitive impairment in Asians: a multi-ethnic population-based study and meta-analysis	Annweiler, et al.	2016	1	0	0	1	0	1	0	0	1	0	1	5
Body mass index in midlife and late-life as a risk factor for dementia: a meta-analysis of prospective studies	Anstey et al.	2010	0	1	1	1	0	1	1	1	1	1	1	9
Alcohol consumption as a risk factor for dementia and cognitive decline: meta-analysis of prospective studies	Anstey et al.	2009	0	1	1	1	0	1	0	1	1	0	0	6
Epidemiologic evidence of a relationship between tea, coffee, or caffeine consumption and cognitive decline	Arab et al.	2013	1	0	0	1	0	1	0	0	1	0	1	5
The Association between the Mediterranean Dietary Pattern and Cognitive Health: A Systematic Review	Aridi, et al.	2017	1	0	1	1	0	1	1	1	1	0	1	8
Metabolic Syndrome and cognitive decline in the elderly: A systematic review	Assuncao, et al.	2018	1	1	1	1	0	1	1	1	1	1	0	9
Metabolic syndrome, mild cognitive impairment, and dementia: A meta-analysis of longitudinal studies	Atti, et al.	2019	1	1	1	1	0	1	1	1	1	1	0	9
A systematic review of longer-term dietary interventions on human cognitive function: Emerging patterns and future directions	Attuquayefio, Stevenson	2015	1	0	1	1	0	1	0	0	1	0	0	5
Vitamin D status and ill health: a systematic review	Autier et al.	2014	1	1	1	1	0	1	0	0	1	0	1	7
Concomitant vascular and neurodegenerative pathologies double the risk of dementia	Azarpazhooh, et al.	2018	1	1	1	1	1	1	0	0	1	1	0	7
Disorder of the personality: a possible factor of risk for the dementia	Bastida, et al.	2019	1	0	1	0	0	1	0	0	0	0		3
Motor phenotype of decline in cognitive performance among community-dwellers without dementia: population-based study and meta-analysis	Beauchet et al.	2014	1	0	0	1	0	1	1	1	1	0	1	7
Association of motoric cognitive risk syndrome with cardiovascular disease and risk factors: Results from an original study and meta-analysis	Beauchet, et al.	2018	1	1	1	0	0	1	1	1	1	0	1	8
Anxiety as a risk factor of Alzheimer's disease and vascular dementia	Becker, et al.	2018	1	1	1	1	0	1	1	1	1	1	1	10
Neighborhood environment and cognition in older adults: A systematic review	Besser, et al.	2017	1	0	1	1	0	1	1	1	1	1	1	9
Epidemiologic studies of modifiable factors associated with cognition and dementia: systematic review and meta-analysis	Beydoun et al.	2014	1	0	0	1	0	1	0	0	1	1	0	5
The influence of vascular risk factors on cognitive decline in patients with dementia: A systematic review	Blom et al.	2013	1	0	1	1	1	1	0	0	1	0	1	6
The association between cognitive function and white matter lesion location in older adults: A systematic review	Bolandzadeh, et al.	2012	1	1	1	1	0	1	1	1	1	0	1	8
Frailty as a Predictor of Cognitive Disorders: A Systematic Review and Meta-Analysis	Borges, et al.	2019	1	1	1	1	1	1	1	1	1	1	1	11
Loneliness and cognitive function in the older adult: A systematic review	Boss et al.	2015	1	0	1	1	1	1	0	0	1	0	1	7
Cerebral microinfarcts: a systematic review of neuropathological studies	Brundel, et al.	2012	1	0	1	1	0	1	0	0	1	0	1	5
Sleep, Cognitive impairment, and Alzheimer's disease: A Systematic Review and Meta-Analysis	Bubu, et al.	2017	1	1	1	1	0	1	1	1	1	1	1	10
Familial Alzheimer's disease sustained by presenilin 2 mutations: Systematic review of literature and genotype-phenotype correlation	Canevelli	2013	1	1	1	0	0	1	1	0	1	0	1	6
Nutrition and Dementia: Evidence for Preventive Approaches?	Canevelli,M. et al	2016	1	0	0	1	0	1	0	0	1	0	1	5
Dietary patterns and risk of dementia: A systematic review and meta-analysis of cohort studies	Cao, L. et al	2016	1	1	1	1	0	1	0	0	1	1	1	8
Epidemiology of dementia in Asia: Insights on prevalence, trends and novel risk factors	Catindig et al.	2012	1	0	0	1	0	1	0	0	1	0	1	5
Depression and Antidepressants as Potential Risk Factors in Dementia: A Systematic Review and Meta-analysis of 18 Longitudinal Studies	Chan, et al.	2019	1	1	1	1	0	1	1	1	1	1	1	10
Association between asymptomatic carotid stenosis and cognitive function: A systematic review	Chang et al.	2013	1	1	0	0	0	1	1	0	1	1	1	6
Life-course determinants of cognitive reserve (CR) in cognitive aging and dementia - a systematic literature review	Chapko, et al.	2017	1	1	1	1	1	1	1	1	1	1	1	11
Clinical significance of cerebral microbleeds on MRI: A comprehensive meta-analysis of risk of intracerebral hemorrhage, ischemic stroke, mortality, and dementia in cohort studies (v1)	Charidimou, et al.	2018	1	1	1	1	0	1	1	1	1	1	1	10
25-hydroxyvitamin D levels and the risk of dementia and Alzheimer's disease: A dose-response meta-analysis	Chen, H., et al.	2018	1	1	1	1	0	1	1	1	1	1	1	10
Tooth loss is associated with increased risk of dementia and with a dose-response relationship	Chen, J., et al.	2018	1	1	1	1	0	1	1	1	1	1	1	10
Influence of four polymorphisms in ABCA1 and PTGS2 genes on risk of Alzheimer’s disease: a meta-analysis	Chen, Q., et al.	2016	1	1	1	1	0	1	1	1	1	1	1	9
Association of passive smoking with cognitive impairment in nonsmoking older adults: A systematic literature review and a new study of Chinese cohort	Chen, R., et al.	2013	1	0	1	1	0	1	0	0	1	0	1	6
Alcohol-Related Dementia: A Systemic Review of Epidemiological Studies	Cheng, C. et al.	2017	1	0	0	1	0	1	0	0	1	0	1	5
Estrogen receptor alpha gene polymorphisms and risk of Alzheimer's disease: evidence from a meta-analysis	Cheng, D., et al.	2014	1	1	1	1	0	1	0	0	1	1	1	7
Diabetes as a risk factor for dementia and mild cognitive impairment: a meta-analysis of longitudinal studies	Cheng, G., et al.	2012	0	1	1	1	0	1	1	1	1	1	0	8
Social correlates of mental, neurological, and substance use disorders in China and India: a review	Cheng, H.G. et al	2016	1	1	1	1	0	1	0	0	1	0	1	7
Dementia risk estimates associated with measures of depression: a systematic review and meta-analysis	Cherbuin et al.	2015	1	1	1	1	0	1	1	1	1	1	1	10
Hippocampal volumes in patients with chronic combat-related posttraumatic stress disorder: A systematic review	Childress, et al.	2013	0	0	0	0	0	1	1	1	1	0	1	5
Sarcopenia Is Associated with Cognitive Impairment in Older Adults: A Systematic Review and Meta-Analysis	Cipolli, et al.	2019	1	1	1	1	0	1	1	1	1	1	1	10
Exposure to air pollution and cognitive functioning across the life course--A systematic literature review	Clifford, et al.	2016	1	0	1	1	0	1	0	0	1	0	1	6
Modifiable predictors of dementia in mild cognitive impairment: A systematic review and meta-analysis	Cooper, et al.	2015	1	0	1	1	0	1	1	1	1	1	1	9
Apolipoprotein e ε4 prevalence in alzheimer's disease patients varies across global populations: a systematic literature review and meta-analysis	Crean, et al.	2011	1	1	1	0	0	0	1	1	1	0	1	6
Dietary antioxidants, cognitive function and dementia--a systematic review	Crichton et al.	2013	1	0	1	1	0	1	0	0	1	0	1	6
Metabolic syndrome, cognitive performance, and dementia	Crichton et al.	2012	1	0	0	0	0	1	0	1	na	0	0	2
Long-Term Effects of Postoperative Delirium in Patients Undergoing Cardiac Operation: A Systematic Review	Crocker, E. et al.	2016	1	1	1	1	0	1	1	0	1	1	0	8
Affective disorders and risk of developing dementia: Systematic review	da Silva et al.	2013	1	0	1	1	0	1	1	1	1	1	0	8
Obesity and cognitive aging	Dahl et al.	2013	1	0	1	0	0	1	0	0	0	0	1	4
B-vitamins and fatty acids in the prevention and treatment of Alzheimer's disease and dementia: A systematic review	Dangour et al.	2010	1	1	1	1	0	1	1	0	1	0	0	7
Association between Depressive Symptoms and Cognitive Function in Persons with Diabetes Mellitus: A Systematic Review	Danna, et al..	2016	1	1	1	1	0	1	1	1	1	1	1	10
Genetic contributions to variation in general cognitive function: a meta-analysis of genome-wide association studies in the CHARGE consortium (N=53949)	Davies, et al.	2015	1	na	na	na	1	1	1	1	1	na	1	6
Insomnia and risk of dementia in older adults: Systematic review and meta-analysis	De Almondes, et al.	2016	0	1	1	1	0	1	1	1	1	1	1	9
Exercise-dependent BDNF as a modulatory factor for the executive processing of individuals in course of cognitive decline. A systematic review	de Assis, et al.	2017	1	1	1	1	0	1	0	0	1	0	1	7
Long-Term Green Space Exposure and Cognition Across the Life Course: a Systematic Review	De Keijzer, C. et al	2016	1	0	1	1	0	1	1	1	1	0	1	8
Target risk factors for dementia prevention: A systematic review and Delphi consensus study on the evidence from observational studies	Deckers, et al.	2014	1	0	0	1	1	1	1	1	1	0	1	8
Dementia risk in renal dysfunction: A systematic review and meta-analysis of prospective studies	Deckers, et al.	2017	1	1	1	1	0	1	1	1	1	1	0	9
Job burnout and cognitive functioning: A systematic review	Deligkaris, et al.	2014	1	1	1	1	1	1	1	1	1	0	0	9
Living alone and risk of dementia: A systematic review and meta-analysis	Desai, et al.	2020	1	1	1	1	0	1	1	1	1	1	1	10
Modifiable lifestyle factors in dementia: A systematic review of longitudinal observational cohort studies	Di Marco et al.	2014	1	0	1	1	1	1	1	0	0	0	1	7
Exposure to Environmental and Occupational Particulate Air Pollution as a Potential Contributor to Neurodegeneration and Diabetes: A Systematic Review of Epidemiological Research	Dimakakou, et al.	2018	1	1	1	1	0	1	1	1	1	1	1	10
Late-life depression and risk of vascular dementia and Alzheimer's disease: systematic review and meta-analysis of community-based cohort studies	Diniz et al.	2013	0	1	1	1	0	1	1	1	1	1	1	9
History of Bipolar Disorder and the Risk of Dementia: A Systematic Review and Meta-Analysis	Diniz, B. S. et al.	2017	1	1	1	1	0	1	1	1	1	1	1	10
Impact of Bilateral Vestibulopathy on Spatial and Nonspatial Cognition: A Systematic Review	Dobbels, et al.	2019	1	1	1	1	1	1	1	1	1	0	1	10
Do low-serum vitamin E levels increase the risk of Alzheimer disease in older people? Evidence from a meta-analysis of case-control studies	Dong, et al.	2018	1	1	1	1	0	1	1	1	1	1	1	10
Association Between Interleukin-1A, Interleukin-1B, and Bridging integrator 1 Polymorphisms and Alzheimer's Disease: a standard and Cumulative Meta-analysis	Dong, X. Et al	2017	1	1	1	1	0	1	1	1	1	1	0	8
Association of Serum Manganese Levels with Alzheimer's Disease and Mild Cognitive Impairment: A Systematic Review and Meta-Analysis	Du, K. et al.	2017	1	1	1	1	0	1	1	1	1	1	1	10
Inverse Association Between Serum Uric Acid Levels and Alzheimer's Disease Risk	Du, N. et al.	2016	1	1	1	1	0	1	0	1	1	1	1	9
Non-Pharmacological Interventions for Cognition in Patients with Type 2 Diabetes Mellitus: A Systematic Review	Dyer, et al.	2019	1	1	1	1	0	1	1	1	1	1	1	10
Predictive value of APOE-epsilon4 allele for progression from MCI to AD-type dementia: a meta-analysis	Elias-Sonnenschein, et al.	2011	1	1	0	1	0	1	1	1	1	1	0	7
Memory impairment among people who are homeless: a systematic review	Ennis et al.	2015	1	0	1	1	1	1	1	1	1	1	0	9
Vitamin D deficiency, cognitive impairment and dementia: A systematic review and meta-analysis	Etgen et al.	2012	1	0	1	1	0	1	1	0	0	1	1	7
Chronic kidney disease and cognitive impairment: a systematic review and meta-analysis	Etgen et al.	2012	1	0	1	1	0	1	0	0	1	1	1	6
Tooth loss as a risk factor for dementia: Systematic review and meta-analysis of 21 observational studies	Fang, et al.	2018	1	0	1	0	0	1	1	1	1	1	1	8
Apolipoprotein ε4-allele as a significant risk factor for conversion from mild cognitive impairment to Alzheimer's disease: a meta-analysis of prospective studies	Fei, Jianhua	2013	1	1	1	0	0	1	1	1	1	1	0	7
Intermediate- and Long-Term Cognitive Outcomes After Cardiovascular Procedures in Older Adults: A Systematic Review	Fink, et al.	2015	1	1	1	1	0	1	1	1	1	1	1	10
Exercise programs for people with dementia	Forbes et al.	2015	1	1	1	1	1	1	1	1	1	1	1	11
Hearing loss and the risk of dementia in later life	Ford, A.H., et al.	2018	1	0	1	0	0	1	1	1	1	1	1	8
Predicting dementia from primary care records: A systematic review and meta-analysis	Ford, E., et al.2018	2018	1	0	1	1	0	1	1	1	1	1	1	9
Meta-analysis of Telomere Length in Alzheimer's Disease	Forero, D. et al.	2016	1	0	1	1	0	1	1	0	1	0	0	5
Mild cognitive impairment. Part 1: clinical characteristics and predictors of dementia	Forlenza et al.	2013	0	0	1	1	0	0	0	0	0	0	1	3
Fish consumption, long-chain omega-3 fatty acids and risk of cognitive decline or Alzheimer disease: a complex association	Fotuhi et al.	2009	1	1	1	1	0	1	0	0	1	0	0	6
The risk of neurodegeneration in REM sleep behavior disorder: A systematic review and meta-analysis of longitudinal studies	Galbiati, et al.	2019	1	1	1	1	0	1	1	1	1	1	1	10
Polymorphisms of chat but not TFAM or VR22 are associated with alzheimer disease risk	Gao, L. et al.	2016	1	1	1	1	0	1	0	0	1	1	0	6
Depression as a risk factor for dementia and mild cognitive impairment: a meta-analysis of longitudinal studies	Gao, Y., et al.	2013	1	1	1	1	0	1	1	1	1	0	1	9
Support for midlife anxiety diagnosis as an independent risk factor for dementia: a systematic review	Gimson, et al.	2018	1	1	1	1	0	1	1	1	1	1	1	10
A Systematic Review and Meta-Analysis of The Effect of Low Vitamin D on Cognition	Goodwill, A. et al.	2017	1	0	1	1	0	1	1	0	1	1	1	8
Delirium and dementia with Lewy bodies: Distinct diagnoses or part of the same spectrum?	Gore et al.	2014	1	0	1	1	0	0	0	0	1	0	1	5
Association between α1-antichymotrypsin signal peptide -15A/T polymorphism and the risk of Alzheimer's disease: a meta-analysis	Guan, F., et al.	2012	1	1	1	1	0	1	1	1	1	1	0	8
No association between hypertension and risk for Alzheimer's disease: A meta-analysis of longitudinal studies	Guan, J.W., et al.	2011	0	0	1	0	0	1	1	1	1	1	0	6
Ankle-brachial index as a marker of cognitive impairment and dementia in general population. A systematic review	Guerchet et al.	2011	1	1	1	1	0	1	1	1	na	0	0	6
Anxiety as a Predictor for Cognitive Decline and Dementia: A Systematic Review and Meta-Analysis	Gulpers, G. et al	2016	1	1	1	1	0	1	1	1	1	1	1	10
Occupational Exposures and Neurodegenerative Diseases-A Systematic Literature Review and Meta-Analyses	Gunnarsson, et al.	2019	1	0	1	0	0	0	1	1	1	1	1	7
Impact of Physical Activity on Cognitive Decline, Dementia, and Its Subtypes: Meta-Analysis of Prospective Studies	Guure, C.B. et al	2017	1	1	1	1	0	1	1	1	1	1	1	10
Comorbidity and progression of late onset Alzheimer's disease: A systematic review	Haaksma, M. et al.	2017	1	1	1	1	0	1	1	1	na	0	0	7
Short telomere length is associated with impaired cognitive performance in European ancestry cohorts	Hägg, S. et al.	2017	1	na	na	na	1	1	1	1	1	na	1	7
Cognitive change in heart failure: a systematic review	Hajduk et al.	2013	1	0	1	1	0	1	1	1	1	1	0	7
Physical activity and risk of neurodegenerative disease: A systematic review of prospective evidence	Hamer, Chida	2009	1	1	1	1	0	1	1	1	1	1	1	9
Association between metabolic syndrome and cognitive decline: A systematic review of prospective population-based studies	Hao et al.	2011	1	1	1	0	0	1	1	1	na	0	0	5
Cognitive impairment in the remitted state of unipolar depressive disorder: A systematic review	Hasselbalch, et al.	2011	1	0	1	0	0	1	0	1	1	1	1	7
Vascular endothelial growth factor polymorphisms and risk of Alzheimer's disease: a meta-analysis	He, D., et al.	2013	1	1	1	1	0	1	1	1	1	1	1	9
Modifiable factors and cognitive dysfunction in breast cancer survivors: a mixed-method systematic review	Henneghan, A.	2016	1	1	1	1	0	1	0	0	1	1	0	7
Associations between retinal microvascular changes and dementia, cognitive functioning, and brain imaging abnormalities: a systematic review	Heringa, et al.	2013	1	0	1	0	0	1	0	0	1	1	1	5
Risk factors associated with the onset and progression of Alzheimer's disease: A systematic review of the evidence	Hersi, M. et al.	2017	1	0	1	1	1	1	0	0	1	0	1	7
Diet and biomarkers of Alzheimer's disease: a systematic review and meta-analysis	Hill, et al.	2019	1	0	1	1	0	1	1	1	1	1	1	9
The prevalence and progression of mild cognitive impairment among clinic and community populations: a systematic review and meta-analysis	Hu, C. et al	2017	1	1	1	1	0	1	1	1	1	1	1	10
Association between the MTHFR gene and Alzheimer's disease: a meta-analysis	Hua, Y., et al.	2011	1	0	1	0	0	1	1	1	1	1	1	7
Meta-analysis of the association between the interleukin-1A-889C/T polymorphism and Alzheimer's disease	Hua,Y., et al.	2012	1	1	1	1	0	1	1	1	1	1	0	8
Saitohin Q7R polymorphism is associated with late-onset Alzheimer's disease susceptibility among caucasian populations: a meta-analysis	Huang, R. et al.	2017	1	1	1	1	0	1	1	1	1	1	1	10
Efficacy of cognitive rehabilitation therapies for mild cognitive impairment (MCI) in older adults: Working toward a theoretical model and evidence-based interventions	Huckans et al.	2013	1	0	0	1	0	1	0	0	1	0	1	5
Atrial fibrillation: A major risk factor for cognitive decline	Hui et al.	2015	1	0	0	0	0	1	0	0	1	0	0	2
Can cognitive leisure activity prevent cognitive decline in older adults? A systematic review of intervention studies	Iizuka, et al.	2019	1	1	1	1	0	1	1	1	1	1	1	10
Occupational exposure to extremely low frequency magnetic field and risk of Alzheimer disease: A systematic review and meta-analysis	Jalilian, et al.	2018	1	1	1	1	0	1	1	1	1	1	1	10
Effects of physical activity on cognitive impairment and dementia	Jia, et al.	2019	1	1	1	1	0	1	1	1	1	1	1	10
Metabolomics in the Development and Progression of Dementia: A Systematic Review	Jiang, Y. et al..	2019	1	1	1	1	0	1	1	1	1	1	1	10
Association of the CR1 polymorphism with late-onset Alzheimer's disease in Chinese Han populations: a meta-analysis	Jin, et al.	2012	1	0	0	0	0	1	1	1	1	1	1	6
Association of traumatic brain injury and Alzheimer disease onset: A systematic review	Julien, et al.	2017	1	1	1	1	0	1	0	1	1	0	1	8
Meta-analysis confirms CR1, CLU, and PICALM as Alzheimer disease risk loci and reveals interactions with APOE genotypes	Jun, et al.	2010	1	na	na	na	na	na	na	1	1	na	1	3
Population studies of sporadic cerebral amyloid angiopathy and dementia: a systematic review	Keage, et al.	2009	1	0	1	0	0	1	0	1	na	0	1	4
The impact of social activities, social networks, social support and social relationships on the cognitive functioning of healthy older adults: a systematic review	Kelly, M. E. et al	2017	1	1	1	1		1	1	1	na	1		8
Environmental risk factors for dementia: a systematic review	Killin, L.O.J. et al	2016	1	0	1	1	0	1	1	1	1	0	1	8
Physical inactivity, cardiometabolic disease, and risk of dementia: an individual-participant meta-analysis	Kivimaki, et al.	2019	1	0	0	1	0	0	0	0	1	0	0	3
Global view on Alzheimer's disease and diabetes mellitus: Threats, risks and treatment Alzheimer's disease and diabetes mellitus	Klimova, et al.	2018	0	0	1	1	0	1	0	0	0	0	1	4
Observational Evidence of the Association Between Handgrip Strength, Hand Dexterity, and Cognitive Performance in Community-Dwelling Older Adults: A Systematic Review	Kobayashi-Cuya, et al.	2018	1	1	1	1	0	1	0	0	1	0	1	7
Risk of Incident Alzheimer's Disease in Diabetic Patients: A Systematic Review of Prospective Trials	Kopf, Frolich	2009	0	0	0	0	0	1	0	0	na	0	0	1
The role of peripheral inflammatory markers in dementia and Alzheimer's disease: a meta-analysis	Koyama, A., et al.	2013	0	1	1	1	0	1	1	1	1	1	0	8
Plasma amyloid-beta as a predictor of dementia and cognitive decline: A systematic review and meta-analysis	Koyama, A., et al.	2012	1	1	1	1	0	0	0	0	1	1	1	6
Size at birth and cognitive ability in late life: A systematic review	Krishna, et al. 2019	2019	1	1	1	1	0	1	1	1	1	1	1	10
Motor function and incident dementia: a systematic review and meta-analysis	Kueper J.K. et al.	2017	1	1	1	1	0	1	1	1	1	1	1	10
Social relationships and risk of dementia: A systematic review and meta-analysis of longitudinal cohort studies	Kuiper, J.S., et al.	2015	0	1	1	1	0	1	1	1	1	1	1	9
Social relationships and cognitive decline: a systematic review and meta-analysis of longitudinal cohort studies	Kuiper, J.S., et al.	2016	1	1	1	1	1	1	1	1	1	1	1	11
Genetic meta-analysis of diagnosed Alzheimer's disease identifies new risk loci and implicates Aβ, tau, immunity and lipid processing	Kunkle, B., et al..	2019	1	na	na	na	na	1	na	1	1	na	1	5
Which risk factors causally influence dementia? A systematic review of Mendelian randomization studies	Kuzma, et al.	2018	1	1	1	1	0	1	1	1	1	1	1	10
Atrial fibrillation and incidence of dementia: A systematic review and meta-analysis	Kwok et al.	2011	0	1	1	1	0	1	1	1	1	0	1	8
Behavioural Risk Factors in Mid-Life Associated with Successful Ageing, Disability, Dementia and Frailty in Later Life: A Rapid Systematic Review	Lafortune, L. et al	2016	1	1	1	1	1	1	1	1	1	0	1	10
Bullous pemphigoid and its association with neurological diseases: a systematic review and meta-analysis	Lai, Y. et al.	2016	1	1	1	1	0	1	1	0	1	1	1	8
Sleep-Disordered Breathing, Postoperative Delirium, and Cognitive Impairment	Lam, E. et al.	2017	1	1	1	1	0	1	1	0	1	1	1	9
The elusive nature of APOE epsilon4 in mid-adulthood: Understanding the cognitive profile	Lancaster, C. et al.	2017	1	0	1	0	1	1	1	1	1	0	1	8
The effects of meditation on grey matter atrophy and neurodegeneration: A systematic review	Last, N. et al.	2017	1	0	1	1	0	1	0	0	1	1	1	7
Systematic review of health behavioral risks and cognitive health in older adults	Lee et al.	2010	1	1	1	1	0	1	1	1	1	1	1	10
The Relationship Between Physical Activity and Dementia: A Systematic Review and Meta-Analysis of Prospective Cohort Studies	Lee J.	2018	1	1	1	1	0	1	1	1	1	1	1	10
Individually modifiable risk factors to ameliorate cognitive aging: a systematic review and meta-analysis	Lehert et al.	2015	1	0	0	1	0	0	0	0	1	0	1	4
Epidemiology of neurodegenerative diseases in sub-Saharan Africa: a systematic review	Lekoubou et al.	2014	1	1	1	1	0	1	0	0	1	0	1	7
Association of Sleep-Disordered Breathing With Cognitive Function and Risk of Cognitive Impairment: A Systematic Review and Meta-analysis	Leng, Y et al	2017	1	0	1	0	0	1	1	1	1	1	1	8
Midlife Hypertension and Alzheimer's Disease: A Systematic Review and Meta-Analysis	Lennon, et al.	2019	1	1	1	1	0	1	1	1	1	1	1	10
Effects of Diabetes Mellitus on Cognitive Decline in Patients with Alzheimer Disease: A Systematic Review	Li, J. et al.	2017	1	1	1	1	0	1	0	0	1	0	1	7
Risk factors for predicting progression from mild cognitive impairment to Alzheimer's disease: a systematic review and meta-analysis of cohort studies	Li, J.O., et al	2016	1	0	1	1	0	1	1	1	1	1	1	9
CYP46A1 intron-2T/C polymorphism and Alzheimer's disease: an updated meta-analysis of 16 studies including 3,960 cases and 3,828 controls	Li, M., et al.	2013	1	1	1	1	1	1	1	1	1	1	1	0
Head Injury as a Risk Factor for Dementia and Alzheimer's Disease: A Systematic Review and Meta-Analysis of 32 Observational Studies	Li, Y. et al.	2017	0	0	1	1	0	1	1	1	1	1	0	7
Common variant in PTK2B is associated with late-onset Alzheimer's disease: A replication study and meta-analyses	Li, Y. et al.	2016	na	na	na	na	na	na	na	na	1	na	1	2
Meaningful use of computers has a potential therapeutic and preventative role in dementia care: A systematic review	Liapis, J., et al.	2017	1	1	1	1	0	1	1	1	1	1	1	10
Association between HFE polymorphisms and susceptibility to Alzheimer's disease: a meta-analysis of 22 studies including 4,365 cases and 8,652 controls	Lin, M., et al.	2012	1	1	1	0	0	1	1	1	1	1	0	7
Association of rs6265 and rs2030324 polymorphisms in brain-derived neurotrophic factor gene with Alzheimer's disease: a meta-analysis	Lin, Y., et al.	2014	1	1	1	1	1	1	0	0	1	1	0	7
Apolipoprotein E gene polymorphism in a Chinese population with vascular dementia: a meta-analysis	Liu, B., et al.	2012	1	1	1	1	0	1	1	1	1	1	1	9
Association of ACE I/D gene polymorphism with vascular dementia: a meta-analysis	Liu, H., et al.	2009	1	1	1	1	0	1	1	1	1	1	0	8
The MTHFR C677T polymorphism contributes to an increased risk for vascular dementia: a meta-analysis	Liu, H., et al.	2010	1	1	1	1	0	1	1	1	1	1	0	8
Habitual coffee consumption and risk of cognitive decline/dementia: A systematic review and meta-analysis of prospective cohort studies	Liu, Q.-P. et al	2016	0	1	1	1	0	1	0	0	1	1	0	6
Vascular endothelial growth factor gene promoter polymorphisms and Alzheimer's disease risk: A meta-analysis	Liu, S.Y., et al.	2013	1	1	1	1	0	1	1	1	1	1	1	9
ApoE gene polymorphism and vascular dementia in Chinese population: a meta-analysis	Liu, X. et al.	2012	1	1	1	1	0	1	0	1	1	1	0	7
Genetic Association of CHAT rs3810950 and rs2177369 Polymorphisms with the Risk of Alzheimer’s Disease: A Meta-Analysis	Liu, Y. et al.	2016	1	1	1	1	0	1	1	1	1	1	1	9
Self-reported sleep duration and cognitive performance in older adults: a systematic review and meta-analysis	Lo, J.C. et al	2016	1	1	1	1	1	1	1	1	1	1	1	11
Midlife obesity and dementia: meta-analysis and adjusted forecast of dementia prevalence in the United States and China	Loef et al.	2013	0	0	1	1	0	1	0	1	1	1	0	6
Zinc diet and Alzheimer's disease: A systematic review	Loef et al.	2012	1	1	1	1	0	1	0	0	1	0	1	7
The omega-6/omega-3 ratio and dementia or cognitive decline: a systematic review on human studies and biological evidence	Loef, Walah	2013	1	1	1	1	0	1	0	0	0	0	1	6
Fruit, vegetables and prevention of cognitive decline or dementia: a systematic review of cohort studies	Loef, Walah a.	2012	1	1	1	1	0	1	0	0	1	0	1	7
Copper and iron in Alzheimer's disease: a systematic review and its dietary implications	Loef, Walah b.	2012	0	0	1	1	0	1	0	1	1	1	0	6
Does personality affect risk for dementia? A systematic review and meta-analysis	Low et al.	2013	0	1	1	1	0	1	1	1	1	0	0	7
Diabetes and the risk of multi-system aging phenotypes: a systematic review and meta-analysis	Lu, F-P., et al.	2009	0	1	1	1	0	1	na	1	1	1	1	8
Quantitative assessment of CYP2D6 polymorphisms and risk of Alzheimer's disease: a meta-analysis	Lu, Y. et al.	2014	1	1	1	1	1	1	1	1	1	1	1	10
Genetic association of CALHM1 rs2986017 polymorphism with risk of Alzheimer's disease: A meta-analysis	Lu, Y. et al.	2016	1	1	1	1	0	1	0	0	1	1	1	7
Incidence of mild cognitive impairment: A systematic review	Luck et al.	2010	0	0	1	0	0	1	0	0	1	0	0	3
Association between Development of Dementia and Use of Benzodiazepines: A Systematic Review and Meta-analysis.	Luccetta, et al.	2018	1	1	1	1	1	1	1	1	1	1	1	11
Low Testosterone Level and Risk of Alzheimer's Disease in the Elderly Men: a Systematic Review and Meta-Analysis	Lv, W. et al.	2016	1	1	1	1	0	1	1	1	1	1	1	9
Association between cancer and Alzheimer's disease: systematic review and meta-analysis	Ma, L., et al.	2014	1	0	0	1	0	1	1	0	1	1	0	6
Meta-Analysis of the Association between Tea Intake and the Risk of Cognitive Disorders	Ma, Q-P. et al.	2016	0	1	1	1	1	1	1	1	1	1	0	9
Delirium and long-term cognitive impairment	Maclullich et al.	2009	1	0	0	0	0	1	0	1	0	0	1	3
Cognitive impairment after lacunar stroke: Systematic review and meta-analysis of incidence, prevalence and comparison with other stroke subtypes	Makin et al.	2013	1	0	1	0	0	1	0	0	1	1	0	4
A systematic review of potential long-term effects of sport-related concussion	Manley, G. et al	2017	1	1	1	1	0	1	1	1	1	1	1	10
Bi-directional interaction between hypoglycaemia and cognitive impairment in elderly patients treated with glucose-lowering agents: a systematic review and meta-analysis	Mattishent, Loke	2016	1	1	1	1	0	1	1	1	1	1	1	9
Sustaining people with dementia or mild cognitive impairment in employment: A systematic review of qualitative evidence	McCuloch, S. et al	2016	1	0	1	1	0	1	1	1	1	0	1	8
Prevalence and Risk of Mild Cognitive Impairment in Low and Middle-Income Countries: A Systematic Review	McGrattan, et al.	2021	1	0	1	1	0	1	1	1	1	1	0	8
Blood pressure lowering in patients without prior cerebrovascular disease for prevention of cognitive impairment and dementia	McGuinness et al.	2009	1	0	1	1	1	1	1	1	1	1	1	9
Cognitive Impairment in Rheumatoid Arthritis: A Systematic Review	Meade T. et al.	2018	1	1	1	1	1	1	1	1	1	1	1	11
From Subjective Cognitive Complaints to Dementia: Who Is at Risk?: A Systematic Review	Mendonça, M.D. et al	2016	1	0	0	1	0	1	0	0	1	0	1	5
Midlife vascular risk factors and the risk of Alzheimer's disease: A systematic review and meta-analysis	Meng et al.	2014	1	0	1	1	0	1	1	1	1	1	0	7
Education and dementia in the context of the cognitive reserve hypothesis: A systematic review with meta-analyses and qualitative analyses	Meng, D'Arcy	2012	1	1	1	1	0	1	1	1	1	1	0	9
Fatigue, psychological and cognitive impairment following transient ischaemic attack and minor stroke: A systematic review	Moran et al.	2014	1	1	1	1	0	1	1	1	1	1	1	10
Carotid atherosclerosis, silent ischemic brain damage and brain atrophy: A systematic review and meta-analysis	Moroni, F. et al.	2016	1	0	1	1	0	1	0	0	1	1	1	6
Normal aging and cognition: The unacknowledged contribution of cerebrovascular risk factors	Morra et al.	2013	1	1	0	1	0	1	0	0	1	0	1	6
Depressive symptoms increase the risk of progression to dementia in subjects with mild cognitive impairment: systematic review and meta-analysis	Mourao, R. J.et al	2016	1	1	1	1	1	1	1	1	1	1	1	11
The Relationship of Bilingualism Compared to Monolingualism to the Risk of Cognitive Decline or Dementia: A Systematic Review and Meta-Analysis	Mukadam, N.et al.	2017	1	0	1	1	1	1	1	1	1	0	0	8
Nutritional Strategies in the Management of Alzheimer Disease: Systematic Review With Network Meta-Analysis	Muñoz Fernández, S.S. et al	2017	0	1	1	1	0	1	1	1	1	1	1	9
Effects of regular cannabis use on neurocognition, brain structure, and function: A systematic review of findings in adults	Nader, Sanchez	2018	1	1	1	1	1	1	0	0	1	0	1	8
Sleep disturbance in mild cognitive impairment: A systematic review of recent findings	Naismith, Mowszowski	2018	0	0	0	0	0	1	0	0	1	0	1	3
Smoking and risk for Alzheimer disease: A meta-analysis based on both case-control and cohort study	Niu, et al.	2018	1	1	1	1	0	1	0	0	1	1	1	8
Are stroke survivors with delirium at higher risk of post-stroke dementia? Current evidence and future directions	Ojagbemi, A., Ftyche	2016	1	0	1	1	0	1	1	1	1	0	0	6
Cognitive outcomes after heart valve surgery: A systematic review and meta-analysis	Oldham, M, et al.	2018	1	1	1	1	0	1	0	1	1	0	1	8
Is poor health literacy a risk factor for dementia in older adults? Systematic literature review of prospective cohort studies	Oliveira, et al.	2019	1	1	1	1	0	1	1	1	1	1	1	10
Mild cognitive impairment and progression to dementia in people with diabetes, prediabetes and metabolic syndrome: A systematic review and meta-analysis	Pal, et al.	2018	1	1	1	1	0	1	1	1	1	1	0	9
Can sleep apnea cause Alzheimer's disease?	Pan et al.	2014	1	0	1	1	0	1	0	0	1	1	1	6
Arterial stiffness as a cause of cognitive decline and dementia: a systematic review and meta-analysis	Pase et al.	2012	1	1	1	1	0	1	1	1	1	0	0	7
The risk of overweight/obesity in mid-life and late life for the development of dementia: a systematic review and meta-analysis of longitudinal studies	Pedditizi, E. et al.	2016	1	1	1	1	1	1	1	1	1	0	1	10
Prevalence, incidence, and factors associated with pre-stroke and post-stroke dementia: a systematic review and meta-analysis	Pendlebury et al.	2009	1	1	1	1	0	1	1	1	1	1	1	9
The Association between Social Engagement, Loneliness, and Risk of Dementia: A Systematic Review and Meta-Analysis	Penninkilampi, R. et al	2018	1	1	1	1	0	1	1	1	1	1	1	10
Nutrition and vascular dementia	Perez et al.	2012	1	0	0	1	0	0	0	0	0	0	1	3
Is air pollution associated with increased risk of cognitive decline? A systematic review	Peters et al.	2015	1	0	1	1	1	1	1	1	1	1	1	10
Trajectory of blood pressure, body mass index, cholesterol and incident dementia: systematic review	Peters, et al.	2019	1	1	1	1	0	1	1	1	1	1	1	10
Mediterranean Diet, Cognitive Function, and Dementia: A Systematic Review of the Evidence	Petersson, Philippou	2016	1	1	1	1	1	1	1	1	1	1	1	11
The impact of alcohol on Alzheimer's disease: a systematic review	Piazza-Gardner et al.	2013	1	0	0	1	0	1	0	0	1	0	0	4
Systematic review: factors associated with risk for and possible prevention of cognitive decline in later life	Plassmann et al.	2010	1	1	1	1	0	0	1	1	1	0	1	8
The association between blood pressure and incident Alzheimer disease: a systematic review and meta-analysis	Power et al.	2011	0	1	1	1	0	1	na	1	1	1	0	7
Can cardiac resynchronization therapy improve cognitive function? A systematic review	Proietti et al.	2014	1	1	1	0	0	1	1	1	1	1	0	7
Cardiovascular risk factors and incident Alzheimer disease: A systematic review of the literature	Purnell et al.	2009	1	0	0	0	0	1	0	1	na	0	0	2
Interleukin-6 -174G/C polymorphism and the risk of Alzheimer's disease in Caucasians: a meta-analysis	Qin	2012	1	1	1	1	0	1	1	1	1	1	1	9
Association between circulating hemostatic measures and dementia or cognitive impairment: systematic review and meta-analyzes	Quinn	2011	1	1	1	1	0	1	1	1	1	1	1	6
Methylenetetrahydrofolate Reductase (MTHFR) C677T Polymorphism and Alzheimer Disease Risk: a Meta-Analysis	Rai, V.	2017	1	0	1	1	0	1	0	0	1	1	0	5
What is the prevalence of cognitive impairment in lupus and which instruments are used to measure it? A systematic review and meta-analysis	Rayes, H. et al.	2018	1	1	1	1	0	1	1	1	1	1	1	10
Cerebral small vessel disease and risk of incident stroke, dementia and depression, and all-cause mortality: A systematic review and meta-analysis	Rensma, S. et al.	2018	1	1	1	1	1	1	1	1	1	1	1	11
Symptom onset in autosomal dominant Alzheimer disease: A systematic review and meta-analysis	Ryman et al.	2014	1	0	0	0	0	0	0	0	1	0	1	3
Late-life Cognitive Activity and Dementia: A Systematic Review and Bias Analysis	Sajeev,G. et al	2016	1	0	1	1	0	1	0	0	1	1	1	7
Potentially Modifiable Risk Factors for Long-Term Cognitive Impairment After Critical Illness: A Systematic Review	Sakusic, A. et al.	2018	1	1	1	1	0	1	1	1	1	1	1	10
Anxiety and risk of dementia: Systematic review and meta-analysis of prospective cohort studies	Santaba ́rbara, et al.	2019	1	1	1	1	0	1	1	1	1	1	1	10
Epidemiological studies of the effect of stroke on incident dementia: a systematic review	Savva et al.	2010	1	0	1	0	0	1	0	0	0	0	0	2
Early life epidemiology of Alzheimer's Disease-A critical review	Seifan et al.	2015	0	0	0	0	0	1	0	0	1	0	1	3
Exposure to general anesthesia and risk of Alzheimer's disease: a systematic review and meta-analysis	Seitz et al.	2011	1	0	1	1	0	1	1	1	1	1	1	8
Motoric cognitive risk syndrome, incident cognitive impairment and morphological brain abnormalities: Systematic review and meta-analysis	Sekhon, et al.	2019	1	1	1	0	0	1	1	1	1	1	1	9
Relationship between education and dementia: an updated systematic review	Sharp et al.	2011	0	1	1	1	0	1	0	1	1	0	1	7
Hypertension is a potential risk factor for vascular dementia: Systematic review	Sharp et al.	2011	0	1	1	1	0	1	na	1	1	0	1	7
Vitamin D deficiency is associated with increased risk of Alzheimer's disease and dementia: evidence from meta-analysis	Shen, L., Ji, H.F.	2015	1	1	0	1	0	1	0	0	1	0	1	6
Chronic kidney disease-related physical frailty and cognitive impairment: A systemic review	Shen, Z. et al.	2017	1	0	1	1	0	1	0	0	1	0	0	4
Mapping the Relationship of Contributing Factors for Preclinical Alzheimer's Disease	Shi, L., et al.	2015	1	0	0	0	0	1	0	0	1	0	0	3
Sleep disturbances increase the risk of dementia: A systematic review and meta-analysis	Shi, Y., et al.	2018	1	1	1	1	0	1	1	1	1	1	1	10
Intentional weight loss in overweight and obese individuals and cognitive function: a systematic review and meta-analysis	Siervo et al.	2011	1	1	1	1	0	1	1	1	1	1	1	10
Effect of exercise on cognitive performance in community-dwelling older adults: Review of intervention trials and recommendations for public health practice and research	Snowden et al.	2011	1	1	1	1	0	1	1	1	1	0	1	9
Relationships of Dietary Patterns, Foods, and Micro- and Macronutrients with Alzheimer's Disease and Late-Life Cognitive Disorders: A Systematic Review	Solfrizzi; V. t al.	2017	1	0	1	1	0	1	0	0	1	0	0	5
Vitamin D deficiency as a risk factor for dementia: a systematic review and meta-analysis	Sommer, I. et al.	2017	1	1	1	1	0	1	1	1	1	0	1	9
Marriage and risk of dementia: Systematic review and meta-analysis of observational studies	Sommerlad, et al.	2017	1	1	1	1	0	1	1	1	1	1	1	10
Risk factors of rapid cognitive decline in Alzheimer's disease and mild cognitive impairment: A systematic review and meta-analysis	Song, et al.	2018	1	1	1	1	0	1	1	1	1	1	1	10
The possible involvement of mitochondrial dysfunctions in Lewy body dementia: A systematic review	Spano, et al..	2015	1	0	1	1	0	0	0	0	1	0	0	3
A systematic review on the association between inflammatory genes and cognitive decline in non-demented elderly individuals	Stacey, D, et al.	2017	0	0	0	0	0	1	0	0	1	0	1	3
The Effect of Non-Stroke Cardiovascular Disease States on Risk for Cognitive Decline and Dementia: A Systematic and Meta-Analytic Review	Stefanidis, et al.	2018	1	0	1	1	1	1	0	0	1	1	0	6
Physical activity and Alzheimer's disease: A systematic review	Stephen R., et al.	2017	1	1	1	1	0	1	1	1	1	1	1	10
Nutrition and Cognition in Older Adults With Heart Failure: A Systematic Review	Stewart et al.	2015	1	1	1	1	0	1	1	1	1	0	1	9
Passive smoking as a risk factor for dementia and cognitive impairment: systematic review of observational studies	Stirland, et al.	2018	1	1	1	1	1	1	1	1	1	1	1	11
The genetic risk of Alzheimer’s disease beyond APOE ε4: systematic review of Alzheimer’s genetic risk scores	Stocker, H. et al.	2018	1	1	1	1	0	1	1	1	1	0	1	9
Updated meta-analysis of the role of APOE epsilon2/epsilon3/epsilon4 alleles in frontotemporal lobar degeneration	Su, W. et al.	2017	1	0	1	1	0	1	1	1	1	1	1	9
The association between dementia and epilepsy: A systematic review and meta-analysis	Subota, A. et al.	2017	1	1	1	1	0	1	1	0	1	0	1	8
Genetics of Vascular Dementia: Systematic Review and Meta-Analysis	Sun, J-H.	2015	1	0	1	1	0	1	1	1	1	1	0	8
Apolipoprotein E Polymorphisms and Parkinson Disease With or Without Dementia: A Meta-Analysis Including 6453 Participants	Sun, R. et al.	2019	1	1	1	0	0	1	1	1	1	1	1	9
Association between mastication and cognitive status: A systematic review	Tada, A .et al.	2017	1	1	1	1	0	1	1	1	1	1	1	10
Depressive Symptoms in Mild Cognitive Impairment and the Risk of Dementia: A Systematic Review and Comparative Meta-Analysis of Clinical and Community-Based Studies	Tan, et al.	2019	1	1	1	1	0	1	1	1	1	1	1	10
Periodontal disease, tooth loss and dementia: Is there a link? A systematic review	Tonsekar, P.P. et al	2017	1	1	1	1	1	1	1	1	1	1	1	11
Atrial fibrillation as a risk factor for cognitive impairment: a semi-systematic review	Udompanich et al.	2013	1	0	1	0	0	1	0	1	1	0	1	5
Rheumatoid arthritis and the risk of dementia: A systematic review and meta-analysis	Ungprasert, P. et al.	2016	1	1	0	1	0	1	1	0	1	1	1	7
Type 2 diabetes as a risk factor for Alzheimer's disease: the confounders, interactions, and neuropathology associated with this relationship	Vagelatos et al.	2013	0	0	1	1	0	1	0	1	1	1	0	6
Association of apathy with risk of incident dementia: A systematic review and meta-analysis	van Dalen, et al.	2018	1	1	1	1	0	1	1	1	1	1	1	10
Hyperhomocysteinemia and Alzheimer's disease: A systematic review	Van Dam	2009	0	0	1	0	1	1	1	1	0	0	1	6
Dietary patterns, cognitive decline, and dementia: a systematic review	Van de Rest et al.	2015	1	1	1	1	0	1	1	1	1	0	1	9
Type 2 diabetes mellitus, hypertension, dyslipidemia and obesity: A systematic comparison of their impact on cognition	Van den Berg et al.	2009	1	0	0	0	0	1	0	1	1	0	0	3
Hemodynamic and serum cardiac markers and risk of cognitive impairment and dementia	van der Velpen, I. et al.	2017	1	0	0	1	0	1	1	0	1	1	0	5
Subjective cognitive complaints after stroke: a systematic review	van Rijsbergen	2014	1	1	1	1	0	1	1	1	1	1	1	10
Cognitive Impairment in Transient Ischemic Attack Patients: A Systematic Review	van Rooij, F. et al.	2016	1	1	1	1	0	1	1	1	1	1	1	10
Association between arterial stiffness, cerebral small vessel disease and cognitive impairment: A systematic review and meta-analysis	van Sloten	2015	1	1	1	1	0	1	0	0	1	1	1	7
Magnesium status in Alzheimer's disease: A systematic review	Veronese, N. et al.	2016	1	1	0	1	0	1	1	0	1	1	1	8
Decreased Central Nervous System Grey Matter Volume (GMV) in Smokers Affects Cognitive Abilities: A Systematic Review	Vňuková, M. et al.	2017	1	0	1	1	1	1	1	1	1	1	1	10
Alzheimer’s Disease and Related Dementia in Indigenous Populations: A Systematic Review of Risk Factors	Walker, et al.	2020	1	1	1	1	0	1	1	1	1	0	0	8
Meta-analysis of peripheral blood apolipoprotein E levels in Alzheimer's disease	Wang, C. et al.	2014	1	1	1	1	0	1	1	1	1	1	1	9
Leisure activities, cognition and dementia	Wang, H.-X. et al.	2012	1	0	1	1	0	1	1	0	0	1	0	6
Headache disorder and the risk of dementia: a systematic review and meta-analysis of cohort studies	Wang, J. et al.	2018	1	1	1	1	1	1	1	1	1	1	1	11
Angiotensin-converting enzyme gene polymorphisms and risk for sporadic Alzheimer's disease: a meta-analysis	Wang, X-B. et al.	2015	1	1	1	1	0	1	1	0	1	1	1	8
Angiotensin-converting enzyme insertion/deletion polymorphism is not a major determining factor in the development of sporadic Alzheimer disease: evidence from an updated meta-analysis	Wang, X-B. et al.	2014	1	1	1	1	0	1	1	1	1	1	1	9
Early-life risk factors for dementia and cognitive impairment in later life: A systematic review and meta-analysis	Wang, X.J. et al.	2019	1	1	1	1	0	1	1	1	1	1	0	9
Thyrotropin and Alzheimer's Disease Risk in the Elderly: a Systematic Review and Meta-Analysis	Wang, Y. et al.	2016	1	1	1	1	0	1	1	1	1	1	1	9
Association between LRP1 C766T polymorphism and Alzheimer's disease susceptibility: a meta-analysis	Wang, Y. et al.	2017	1	1	1	1	0	1	1	0	1	1	0	8
Meta-analysis on the association between the TF gene rs1049296 and AD	Wang, Y., et al.	2013	1	1	1	1	1	1	1	1	1	1	0	9
Association between osteoarthritis and increased risk of dementia: A systemic review and meta-analysis	Weber, et al.	2019	1	1	1	1	0	1	1	1	1	1	1	10
A systematic review and dose-response meta-analysis of sleep duration and the occurrence of cognitive disorders	Wu, L. et al.	2018	1	1	1	1	0	1	1	1	1	1	1	10
Coffee intake and the incident risk of cognitive disorders: A dose-response meta-analysis of nine prospective cohort studies	Wu, L. et al.	2017	1	1	1	1	0	1	1	1	1	1	1	10
Intake of Fruit and Vegetables and the Incident Risk of Cognitive Disorders: A Systematic Review and Meta-Analysis of Cohort Studies	Wu, L. et al.	2017	1	1	1	1	0	1	1	1	1	1	1	10
Omega-3 fatty acids intake and risks of dementia and Alzheimer's disease: A meta-analysis	Wu, S. et al.	2015	0	1	1	1	1	1	1	1	1	1	1	10
Meta-analysis of the association between urokinase-plasminogen activator gene rs2227564 polymorphism and Alzheimer's disease	Wu, W. et al.	2013	1	1	1	1	0	1	1	1	1	1	1	9
The association between community environment and cognitive function: a systematic review	Wu, Y.T. et al.	2015	1	0	1	1	0	1	0	0	1	0	1	6
Distinct Cognitive Trajectories in Late Life and Associated Predictors and Outcomes: A Systematic Review	Wu, Z., et al.	2020	1	1	1	1	0	1	1	1	1	1	1	10
Pgrn is associated with late-onset alzheimer’s disease: A case–control replication study and meta-analysis	Xu, H. et al.	2017	1	1	1	0	0	1	1	0	1	1	0	6
Alcohol consumption and dementia risk: a dose-response meta-analysis of prospective studies	Xu, W. et al	2017	1	1	1	1	1	1	1	1	1	1	1	11
Pesticide exposure and risk of Alzheimer's disease: a systematic review and meta-analysis	Yan, D. et al.	2016	1	0	1	1	0	1	1	1	1	1	1	9
C-reactive protein plays a marginal role in cognitive decline: a systematic review and meta-analysis	Yang, et al.	2014	1	1	1	1	0	1	1	0	1	0	0	6
Mild cognitive impairment and mood: a systematic review	Yates, J.A. et al.	2013	0	1	1	1	0	0	1	1	1	1	1	8
Cognitive leisure activities and future risk of cognitive impairment and dementia: systematic review and meta-analysis	Yates, L.A. et al	2016	0	1	1	1	0	0	1	1	1	1	1	8
Mild cognitive impairment in type 2 diabetes mellitus and related risk factors: A review	Yuan and Wang	2017	0	0	0	0	0	0	0	0	1	0	0	1
Association of microtubule-associated protein tau gene polymorphisms with the risk of sporadic Alzheimer's disease: a meta-analysis	Yuan, H. et al.	2018	1	1	1	1	0	1	1	0	1	1	1	9
Angiotensin-converting enzyme gene insertion-deletion polymorphism is a risk marker for Alzheimer's disease in a Chinese population: a meta-analysis of case-control studies	Yuan, Y. et al.	2015	1	1	1	1	0	1	0	0	1	1	1	7
Alzheimer's disease and diet: a systematic review	Yusufov, M. et al	2017	1	0	1	1	0	1	0	0	1	0	1	6
An exploration of the role of a fish-oriented diet in cognitive decline: a systematic review of the literature	Zeng, L-F et al	2017	1	1	1	1	0	1	1	1	1	1	1	10
Efficacy of Vitamin B Supplementation on Cognition in Elderly Patients with Cognitive-Related Diseases: A Systematic Review and Meta-Analysis	Zhang, D.M. et al	2017	1	1	1	1	0	1	1	1	1	na	1	9
An updated meta-analysis of cohort studies: Diabetes and risk of Alzheimer's disease	Zhang, J. et al	2017	1	1	1	1	0	0	1	1	1	1	1	9
Chronic obstructive pulmonary disease as a risk factor for cognitive dysfunction: A meta-analysis of current studies	Zhang, X. et al	2016	1	1	1	1	0	1	1	1	1	1	0	8
Intakes of fish and polyunsaturated fatty acids and mild-to-severe cognitive impairment risks: a dose-response meta-analysis of 21 cohort studies	Zhang, Y. et al.	2016	0	1	1	0	1	1	1	1	1	1	1	9
Low expression of aging-related NRXN3 is associated with Alzheimer disease: A systematic review and meta-analysis	Zheng, J. et al.	2018	na	na	na	na	na	na	na	na	na	na	0	0
Hearing impairment and risk of Alzheimer's disease: a meta-analysis of prospective cohort studies	Zheng, Y. et al	2017	1	1	1	1	0	1	1	1	1	1	1	10
Smoking is associated with an increased risk of dementia: a meta-analysis of prospective cohort studies with investigation of potential effect modifiers	Zhong et al.	2015	0	1	1	0	0	1	1	1	1	1	0	7
Hyperhomocysteinemia and risk of incident cognitive outcomes: an updated dose-response meta-analysis of prospective cohort studies	Zhou, F. et al.	2019	1	1	1	1	1	1	1	1	1	1	1	11
Association between stroke and Alzheimer's disease: Systematic review and meta-analysis	Zhou, J. et al	2015	1	1	1	1	0	1	1	0	1	na	0	7
Association between APOC1 polymorphism and Alzheimer’s disease: A case-control study and meta-analysis	Zhou, Q. et al.	2014	1	1	1	1	0	1	0	0	1	1	1	7
TREM2 Variants and Neurodegenerative Diseases: A Systematic Review and Meta-Analysis	Zhou, S. et al.	2019	1	1	1	1	0	1	0	1	1	1	1	9
Sleep-disordered breathing and the risk of cognitive decline: a meta-analysis of 19,940 participants	Zhu, et al.	2018	1	1	1	1	0	1	1	0	1	1	1	9
The Bridging Integrator 1 Gene Polymorphism rs744373 and the Risk of Alzheimer's Disease in Caucasian and Asian Populations: An Updated Meta-Analysis	Zhu, R. et al.	2017	1	1	1	1	0	1	1	0	1	1	1	8
		TOTAL	192	202	268	260	45	295	211	210	292	203	231
