# Supplementary material for: What Do We Know about Social and Non-Social Factors Influencing the Pathway from Cognitive Health to Dementia? A Systematic Review of Reviews
Source: Brain Sci. 2022 Sep 8;12(9):1214. doi: 10.3390/brainsci12091214 (PMC9497077; doi:10.3390/brainsci12091214)
Supplement: Supplementary file 1 [file brainsci-12-01214-s001.zip › Table S6. List of factors in subcategories.xlsx]

## Sheet: Arkusz1
Category	Subcategory	Number of factors	Factors
Demographic (n=25)	Age	9	older age
	Race/ethnicity	9	North American, north European, Indian, sub-Saharan African, Asian, southern European, Malays, Chinese
	Sex	5	female, male
	Bilingualism	2	bilingualism
Environmental (n=30)	Exposure to metals	6	exposure to: lead, copper, iron, mercury, aluminium, silicon, manganese
	Air pollution	5	air pollution
	Pesticides	5	exposure to pesticides
	Sun exposure	5	sun exposure
	Other Environmental	4	industrial food animal production, green space exposure, solvents exposure, selenium exposure
	Low-frequency electromagnetic fields	4	exposure to L-F electromagnetic fields
Socioeconomic (n=40)	Education	24	higher level of education, lower level of education
	Living environment	8	rural residence, urban residence, low SES-neighbourhood, good local community, homelessness
	Socioeconomic status (SES)	5	low, moderate, high SES
	Occupation	3	occupation, meaningful occupation
Psychiatric & Psychological (n=44)	Depression/depressive symptoms	18	clinical depression, depressive symptoms
	Anxiety	9	anxiety symptoms
	Other Psychiatric & Psychological	6	Down Syndrome (DS.), job burnout, non-DS intellectual disability, schizophrenia, personality disorders, affective disorder
	Personality traits	3	"big Five": openness, conscientiousness, extraversion, agreeableness, neuroticism
	Subjective cognitive complaints	2	subjective cognitive complaints
	Delirium	2	delirium
	Bipolar disorders	2	bipolar disorder
	Apathy	2	apathy
Social (n=60)	Social network	13	larger social network, small social network
	Social contacts/isolation	12	frequent social contacts, less social contacts, social isolation
	Marital status	9	Being lifelong single, being widowed, being divorced, being married
	Social support	6	better perceived support, poor social support
	Participation in social activities	5	more frequent/less frequent participation in social activities
	Satisfaction with social ties	5	low/high satisfaction with social ties
	Loneliness	5	loneliness
	Social engagement	5	low/high social engagement
Lifestyle (n=150)	Diet	34	healthy diet (Mediterranean diet, fish, vegetables intake, omega-3 fatty acids), saturated fatty acids, fried food
	Physical activity	24	no physical activity, regular physical activity
	Alcohol	18	lifetime history of alcohol consumption, excessive alcohol consumption, low to moderate alcohol consumption, abstinence
	(passive) Smoking	17	smoking, passive smoking
	Nutritional supplement	16	supplementation of: omega-3 fatty acids, vitamin B12, vitamin C, vitamin E, DHA, EPA
	Weight	14	low BMI (underweight), high BMI (overweight, obese), normal BMI
	Cognitively stimulating activities	12	cognitive training, computer use, cognitive rehabilitation therapies, mentally stimulating activities
	Caffeine	9	coffeine consumption (coffee drinkers), 1-2 cups a day, non-caffeine drinkers
	Sleep pattern	3	extreme sleep duration, short sleep duration, long sleep duration
	Other lifestyle	3	meditation, good mastication, regular cannabis use
Somatic diseases & Biological (n=275)	Somatic Comoridity	138	diabetes, cardiovascular diseases, cerebrovascular diseases, hypertension, obesity, metabolic syndrome, sleep disturbances, post-operative cognitive deficits, trauma, inflammatory diseases of connec-tive tissue, kidney disease, tooth loss, hearing impairment, Parkinson’s disease, chronic obstructive pulmonary disease, cancer related factors
	Genetic predispositions	77	genetic variations, mutations (polymorphism), ApoE ɛ4, ApoE ɛ2, epigenetics, DNA, RNA
	Other somatic diseases & biological	22	Head trauma, Hiperlipidemia, Infectious agents, Atherosclerosis, Oral inflammation, Tooth loss, Kidney disease, Sleep-disordered breathing, Hypotension (including orthostatic), Hiperhomocysteinemia, Hearing impairment, Chronic Obstructive Pulmonary Disease (COPD), Epilepsy, Motoric cognitive risk syndrome, Frailty
	Vitamins, microelements	16	folate, vitamins B6 and B12 levels
	Biomarkers	13	metabolomics etc.
	Neuroimaging	6	CT scans, MRI lesions
	Molecular factors	3	CAA (cerebral amyloid angiopathy), Lower AB42: AB40 ratios
